**Title:** Identification of simplified microbial communities that inhibit *Clostridioides difficile* infection through dilution/extinction

**Running Title:** Simplified communities inhibit *C. difficile*

**Authors:** Jennifer M. Auchtung<sup>1,2</sup>, Eva C. Preisner<sup>1</sup>, James Collins<sup>1,3</sup>, Armando I. Lerma<sup>1,4</sup>, Robert A. Britton<sup>1#</sup>

**Affiliations:**

<sup>1</sup>Alkek Center for Metagenomics and Microbiome Research and Department of Molecular Virology and Microbiology, Baylor College of Medicine, Houston, TX USA

<sup>2</sup>Nebraska Foods for Health Center and Department of Food Science and Technology, University of Nebraska-Lincoln, Lincoln, NE USA

<sup>3</sup>Present address: Department of Microbiology & Immunology, University of Louisville School of Medicine, Louisville, KY USA

<sup>4</sup>Present address: Department of Food Science and Technology, University of Nebraska-Lincoln, Lincoln, NE USA

**#Corresponding author:**

Robert A. Britton, [robert.britton@bcm.edu](mailto:robert.britton@bcm.edu)

## 1 **Abstract**

2 The gastrointestinal microbiome plays an important role in limiting susceptibility to  
3 infection with *Clostridioides difficile*. To better understand the ecology of bacteria  
4 important for *C. difficile* colonization resistance, we developed an experimental platform  
5 to simplify complex communities of fecal bacteria through dilution and rapidly screen for  
6 their ability to inhibit *C. difficile in vitro*. We simplified complex communities from six  
7 fecal donors and found that 17% of simplified communities inhibited *C. difficile* growth  
8 when initially isolated and when re-cultured from frozen stocks. Composition varied  
9 between simplified communities based upon fecal donor used for dilution; complexity  
10 ranged from 19-67 OTUs. One simplified community could be further simplified through  
11 dilution and retain the ability to inhibit *C. difficile*. We tested efficacy of seven simplified  
12 communities in a humanized microbiota mouse model and found that four communities  
13 were able to significantly reduce the severity of the initial *C. difficile* infection and limit  
14 susceptibility to disease relapse. Analysis of fecal microbiomes from treated mice  
15 demonstrated that simplified communities accelerated recovery of endogenous bacteria  
16 and led to stable engraftment of at least 20% of bacteria from simplified communities.  
17 Overall, the insights gained through the identification and characterization of these  
18 simplified communities increase our understanding of the microbial dynamics of *C.*  
19 *difficile* infection and recovery.

## 20 **Importance**

21 *Clostridioides difficile* is the leading cause of antibiotic-associated diarrhea and a  
22 significant healthcare burden. While fecal microbiota transplantation is highly effective at  
23 treating recurrent *C. difficile* disease, uncertainties about the undefined composition of

24 fecal material and potential long-term unintended health consequences have motivated  
25 studies to identify new communities of simple microbes that will be effective at treating  
26 disease. This work describes a platform for rapidly identifying and screening new  
27 simplified communities of microbes for efficacy in treating *C. difficile* infection and  
28 identifies four new simplified communities of microbes with potential for development of  
29 new therapies to treat *C. difficile* disease in humans. While this platform was developed  
30 and validated to model infection with *C. difficile*, the underlying principles described in  
31 the paper could be easily modified to develop therapeutics to treat other gastrointestinal  
32 diseases.

33

## 34 **Introduction**

35 *Clostridioides difficile* is the most common cause of antibiotic-associated diarrhea (1-3).  
36 Estimates of annual healthcare costs associated with treating *C. difficile* infection (CDI)  
37 in the US range from \$1 - 4.8 billion (4). Although uncomplicated infections are typically  
38 self-limiting, severe infections require treatment (5). For approximately 25% of patients,  
39 resolution of primary infection is followed by one or more rounds of recurrent *C. difficile*  
40 infection (rCDI; (6)), which diminishes quality of life and contributes to overall healthcare  
41 costs (7, 8).

42  
43 To cause disease, ingested *C. difficile* spores must germinate into vegetative cells that  
44 produce toxins. The bile salt, cholate and its derivatives, stimulate *C. difficile*  
45 germination, along with co-germinants glycine and other amino acids (9, 10). The  
46 gastrointestinal microbiome plays key roles in limiting symptomatic CDI by competing  
47 with *C. difficile* for nutrients (11-13), producing metabolites that inhibit *C. difficile* growth  
48 (14-18), maintaining immune homeostasis (19-21) and metabolizing primary bile salts  
49 into secondary bile salts that inhibit the growth of vegetative cells (9, 22, 23). Antibiotic  
50 treatment leads to loss of GI microbiome diversity (24-26), is a key risk factor for  
51 primary infection (27-30), and contributes to susceptibility to recurrent disease.

52  
53 Several different therapies are currently used to treat rCDI and act to limit different  
54 aspects of cell growth and pathogenicity. Clinical cure rates of 70% have been reported  
55 following extended-pulsed administration of the antibiotic fidaxomicin (31). An 80% cure  
56 rate has been reported in patients with primary and recurrent CDI treated with

57 bezlotoxumab, an antibody that targets *C. difficile* Toxin B (32). Fecal microbiome  
58 transplantation (FMT) for treatment of rCDI has reported cure rates from 44-100% (33),  
59 (34). However, concern for potential adverse events (e.g., (35) motivates ongoing  
60 studies to develop alternatives to FMT to treat rCDI.

61  
62 Defined community microbial therapeutics are one alternative to FMT under  
63 investigation. Previous studies have demonstrated success in administration of a  
64 consortium of 10 (36) or 33 (37) human fecal bacteria for treatment of rCDI. Despite  
65 these advances, no defined microbial therapeutic is currently available for treatment of  
66 CDI. One limitation to developing microbial community therapeutics is the availability of  
67 appropriate models for rapid screening. We developed a coupled *in vitro* and *in vivo*  
68 platform to screen simple microbial communities for their ability to prevent CDI. We  
69 identified four simplified communities that limited *C. difficile* growth *in vitro* and reduced  
70 severity of disease *in vivo*. While the potential of these communities to treat disease in  
71 humans is unknown, the approaches could be applied to identification of additional  
72 simplified communities to treat rCDI and microbiome-linked diseases.

73

## 74 **Results**

75 **Identification of simplified communities that limit *C. difficile* growth *in vitro*.** To  
76 identify simplified communities that could suppress *C. difficile*, we applied a  
77 dilution/extinction strategy (38, 39) as outlined in Fig. 1A. In this approach, complex  
78 fecal communities are simplified through dilution, with abundant organisms preserved  
79 and rare organisms randomly distributed or lost as predicted by the Poisson distribution.

80  
81 Complex communities were established in minibioreactor arrays (MBRAs) from six  
82 individual fecal donors and allowed to stabilize. Cell density was measured and used  
83 with published OTU abundance data (40) to estimate dilutions needed to simplify  
84 communities by 25-60%. Following dilution, simplified communities were stabilized in  
85 continuous culture before challenge with  $10^4$  vegetative *C. difficile* cells. By measuring  
86 *C. difficile* proliferation in each bioreactor over time, we identified nine highly  
87 suppressive simplified communities that lowered *C. difficile* levels  $\geq 10,000$  times and 15  
88 moderately suppressive communities that lowered *C. difficile* levels by  $\geq 100$  times  
89 lower compared to *C. difficile* cultivated alone in bioreactors (Fig. 1B).

90  
91 To better understand how dilution impacted community composition, we compared the  
92 16S rRNA gene content between *C. difficile*-resistant complex and simplified  
93 communities. The median number of OTUs in the complex communities was 67; the  
94 median number of OTUs in  $10^{-4}$  and  $10^{-5}$  diluted communities were 50 and 42 (Fig. 2A).  
95 Microbial diversity was also reduced by dilution (Fig. 2B).

96  
97 **CDI-resistant simplified communities separate into distinct community types.** We  
98 compared differences in community structure across communities and found that  
99 communities separated primarily by fecal donor used for dilution (Fig. 2C). We identified  
100 OTUs characteristic of differences between simplified communities diluted from donors  
101 1-4 (Fig. 2D). Different *Bacteroides* OTUs were enriched in each of the D1-D4  
102 communities; *Anaerostipes*, *Clostridium\_sensu\_stricto*, *Clostridium XI*, and

103 *Peptoniphilus* were enriched in D2 communities; *Akkermansia*, *Blautia*, *Clostridium*  
104 *XVIII*, and *Enterococcus* were enriched in D3 communities; and *Acidaminococcus*,  
105 *Bilophila* and *Fusobacterium* were enriched in D4 communities.

106  
107 **Simplified communities retain their ability to suppress *C. difficile* when re-**  
108 **cultured.** We re-cultured 17 simplified communities from frozen stocks in triplicate  
109 MBRAs and allowed them to stabilize prior to challenge with *C. difficile*. 13 of the 17  
110 communities were able to inhibit *C. difficile* upon re-culturing. Five communities  
111 suppressed *C. difficile* growth by  $\geq 10,000$ -fold across all three replicates, two  
112 suppressed *C. difficile* by  $\geq 100$ -fold across all three replicates, and six communities  
113 suppressed *C. difficile* in at least one replicate (Fig. S1). We selected one simplified  
114 community (SC) from each community type (SC1-SC4; Fig. 2D) that could suppress *C.*  
115 *difficile* when re-cultured to test in a mouse model of disease.

116  
117 **SC1 and SC2 suppress *C. difficile*-associated disease (CDAD).** We tested SC1-SC4  
118 for their ability to suppress CDAD in a humanized microbiota mouse (<sup>HMb</sup>mouse) model  
119 of disease (41). Two positive controls were used to test for suppression of CDAD: FMT  
120 freshly prepared from <sup>HMb</sup>mice and a cryopreserved aliquot of human FMT previously  
121 used successfully in a CDI fecal transplant program (Savidge, personal  
122 communication). Fig. 3A depicts the strategy for testing SC1-SC4 in the mouse model.  
123 SC1-SC4 were re-cultured in continuous flow bioreactors. Mice were treated with  
124 antibiotics to disrupt the microbiome, then gavaged with cells from simplified  
125 communities, <sup>HMb</sup>mouse or human FMT on three consecutive days; control mice were

126 treated with vehicle (Phosphate Buffered Saline (PBS)). Body mass was measured daily  
127 beginning with the first day of gavage to test for potential toxicity of communities.  
128 Because mice treated with SC4 exhibited ~5% body mass loss from baseline prior to *C.*  
129 *difficile* challenge (Fig. 3B), SC4-treated mice were excluded from further analyses.

130  
131 Following *C. difficile* challenge, mice treated with PBS exhibited up a decline in body  
132 mass (Fig. 3C-D) and shed *C. difficile* in their feces (Fig. 3E-H). In contrast, SC1-treated  
133 mice maintained their body mass, with levels similar to those observed in human or  
134 <sup>H<sub>Mb</sub></sup>mouse FMT-treated mice (Fig. 3D) and exhibited more rapid clearance of *C. difficile*  
135 in feces (Fig. 3G-H). Trends towards reduced body mass loss in SC2 and SC3-treated  
136 and more rapid clearance of *C. difficile* in feces of SC2-treated mice (Fig. 3G-H) were  
137 not statistically significant (Fig. 3D).

138  
139 Because *C. difficile* was cleared more rapidly in SC1 and SC2-treated mice, we tested  
140 whether these communities would reduce susceptibility to recurrent disease. Previously,  
141 we demonstrated relapse could be induced through a single IP injection of clindamycin  
142 (41). Four weeks following the initial *C. difficile* challenge, the majority of mice no longer  
143 shed *C. difficile* at detectable levels in their feces (Fig. S2N-Q). We treated mice with a  
144 single clindamycin IP injection, then measured changes in body mass and *C. difficile*  
145 levels. Consistent with relapse, we observed a modest body mass decline (Fig. 3I) and  
146 an increase of *C. difficile* in feces (Fig. 3J) of PBS-treated mice. In contrast, there was a  
147 modest body mass gain (Fig. 3K), reduced shedding of *C. difficile* in feces (Fig. 3J; Fig.  
148 S2P-Q) and more rapid clearance of *C. difficile* shed in feces (Fig. 3K; Fig. S2P-Q) in



149 SC1 and SC2-treated mice following clindamycin IP. <sup>HMb</sup>mouse and human FMT-treated  
150 mice had a more modest body mass gain that was not statistically significant from PBS-  
151 treated mice.

152  
153 **SC2 can be further simplified and still inhibit *C. difficile* growth.** We asked whether  
154 either SC1 or SC2 could be further simplified through dilution and retain the ability to  
155 prevent *C. difficile* infection. Cultures were diluted to a concentration of 250 CFU/ml ( $10^{-6}$   
156 dilution); Poisson calculations indicated this dilution should reduce complexity of SC1  
157 and SC2 to 17 and 31 OTUs, respectively. Newly diluted cultures were allowed to  
158 stabilize prior to challenge with *C. difficile*. Although  $10^{-6}$  dilutions of SC1 lost the ability  
159 to inhibit *C. difficile*,  $10^{-6}$  dilutions of SC2 continued to inhibit *C. difficile* growth (Fig. 4A).  
160 *C. difficile* inhibition was lost only when SC2 communities were diluted another 10-fold.

161  
162 We analyzed the effects of further simplification on community composition and found  
163 that the number of OTUs declined from a median of 60 in SC2 cultures to medians of 28  
164 and 9 in  $10^{-6}$  and  $10^{-7}$  diluted communities (Fig. 4B). In addition, microbial diversity  
165 decreased (Fig. 4C) and species evenness increased (Fig. 4D) with increasing levels of  
166 dilution. The majority of OTUs lost through dilution were classified in the order  
167 *Clostridiales* (Fig. 4E). We selected three further simplified communities (FS; FS2A,  
168 FS2B, and FS2C) to test for their ability to inhibit CDAD in <sup>HMb</sup>mice.

169  
170 **FS2B and FS2C suppress CDAD in <sup>HMb</sup>mice.** We used the same experimental  
171 approach outlined in Fig. 3 to test FS2A, FS2B, and FS2C. As controls, we

172 administered <sup>HMb</sup>mouse FMT, SC2, and PBS. Similar to our initial study, PBS-treated  
173 mice exhibited body mass loss following challenge with *C. difficile* and this was  
174 prevented by treatment with <sup>HMb</sup>mouse FMT (Fig. 4F). Treatment with SC2 also  
175 prevented body mass loss, which contrasted with prior results in which SC2-treatment  
176 was partially protective. Changes in efficacy could be due to the shifts in microbial  
177 composition upon re-culturing of SC2 (Fig. 4E). FS2B and FS2C-treated mice were also  
178 protected from CDAD, whereas mice treated with community FS2A lost body mass at a  
179 level similar to PBS-treated mice (Fig. 4F).

180

181 PBS-treated mice shed *C. difficile* in feces at similarly high levels across all time points  
182 tested (Fig 4G-I). In SC2 and FS2C-treated mice, *C. difficile* levels were significantly  
183 lower than PBS-treated mice on day 1 of infection, rose by day 4/5 of infection than in  
184 SC2 and declined on day 7 of infection. FS2A and FS2B-treated mice showed little  
185 reduction in levels of *C. difficile*-shedding. FMT-treated mice had significantly lower  
186 levels of *C. difficile* than PBS-treated mice at all time points.

187

188 We also tested inhibition of recurrent CDI. Following induction of relapse, we observed  
189 a ~3% median reduction in body mass in PBS-treated mice on day 2 following IP (Fig  
190 4J). Mice treated with SC2, FS2B, or FS2C showed <0.5% median body mass loss,  
191 whereas FS2A-treated mice exhibited ~5% median body mass loss. <sup>HMb</sup>mouse FMT-  
192 treated mice exhibited ~1% decrease in body mass. We also observed more rapid  
193 clearance of *C. difficile* in FS2B and FS2C-treated mice (Fig. 4K).

194

195 **Treatment with simplified communities has persistent effects on the fecal**  
196 **microbiome.** We analyzed communities from mouse fecal samples on days 1, 4 or 5, 7  
197 and relapse days 0, 2, and 7. Sequence data obtained from mice were pooled with  
198 bioreactor data to facilitate tracking of bacteria present in simplified communities in  
199 treated mice. We found that sequences clustered at  $\geq 99\%$  ANI (Table S1) provided  
200 greater resolution of OTUs distinct to *in vitro*-cultured simplified communities and FMT-  
201 treated <sup>H<sub>Mb</sub></sup>mice than sequences clustered at  $\geq 97\%$  ANI (Table S2). With sequences  
202 clustered at  $\geq 99\%$  ANI, 90% of OTUs found in FMT-treated <sup>H<sub>Mb</sub></sup>mice were not detected  
203 in *in vitro* cultures and likely represent endogenous bacteria. Similarly, 81% of OTUs  
204 found in *in vitro* cultures were not detected in FMT-treated <sup>H<sub>Mb</sub></sup>mice. Subsequent  
205 analyses used OTUs clustered at  $\geq 99\%$  ANI.

206  
207 The number of OTUs detected on day 1 following infection was low across all treatment  
208 groups (Fig. 5A); OTU levels were 25-50% lower than those observed in the FMT  
209 sample collected from mice not treated with antibiotics (Fig. 5A, <sup>H<sub>Mb</sub></sup>mouse). Treatment  
210 with FMT partially restored OTU abundance and microbial diversity on Day 1; full  
211 recovery to levels observed in untreated mice was not observed until Day 4/5 during  
212 infection. In PBS-treated mice, the median number of OTUs detected in fecal samples  
213 increased over time but did not return to the levels detected in untreated mice.  
214 Treatment with SC2, FS2C, or FS2B significantly increased the number of OTUs  
215 detected on Day 1 compared to PBS-treated mice. Later increases in OTU abundance  
216 in FS2C-treated mice paralleled FMT-treated mice treated. For SC2 and FS2B-treated  
217 mice, OTU abundance increased over time but not to the extent observed in FMT-

218 treated mice. Neither OTU abundance nor microbial diversity were significantly different  
219 between FS2A-treated and PBS-treated mice over the first week of infection. Treatment  
220 with FMT, SC2, FS2B and FS2C also significantly increased microbial diversity  
221 compared to PBS-treated mice (Fig. 5B).

222  
223 We also calculated the similarities in community composition between the baseline  
224 <sup>HMb</sup>mouse sample not treated with antibiotics and communities in the feces of treated  
225 mice (Fig. 5C). In FMT-treated mice, fecal communities had low similarities to the  
226 baseline <sup>HMb</sup>mouse sample on day 1, but similarities increased by day 7 (Fig. 5C). In  
227 contrast, similarities between PBS-treated and the baseline untreated <sup>HMb</sup>mouse sample  
228 were significantly lower than FMT-treated mice through relapse day 0. Compared to  
229 PBS-treated mice, FS2C and SC2-treated mice exhibited an accelerated return towards  
230 the baseline microbiome composition. FS2B-treated mice exhibited a return to baseline  
231 microbiome that paralleled PBS-treated mice. In contrast, FS2A-treated mice exhibited  
232 significantly reduced recovery of microbiome composition compared to PBS-treated  
233 mice, indicating FS2A treatment may suppress recovery of the fecal microbiome.

234  
235 ***Treatments shift composition of endogenous bacteria.*** We identified 98 OTUs that  
236 were significantly enriched or depleted in treatments that accelerated microbiome  
237 recovery (FMT, FS2C, SC2) compared to treatments with more prolonged disruption  
238 (PBS, FS2A, FS2B) for at least one of the time points tested (Table S3). We focused on  
239 OTUs with the largest predicted effect sizes ( $LDA \geq 3$ ; Fig. 6). Three OTUs,  
240 *Erysipleotrichaceae* #4, *Bifidobacterium* #12, and *Bacteroidales* #19 were significantly

241 enriched in the mice FS2C, SC2 and FMT-treated mice at all time points.  
242 *Erysipelotrichaceae* #8, *Blautia* #31 and *Clostridium* XIVa #80 were enriched in FS2C,  
243 SC2, and FMT-treated mice on day 1, whereas several *Porphyromonadaceae* OTUs  
244 (#6,#7,#10,#75, #39, #48) as well as three Firmicutes OTUs (*Erysipelotrichaceae* #17,  
245 *Lachnospiraceae* #109, and *Olsenella* #48) were enriched in FS2C, SC2, and FMT-  
246 treated mice at later time points. On day 1 of infection, *Peptostreptococcaceae* #35 and  
247 *Enterococcus* #28 were enriched in the feces of PBS, FS2A, and FS2B-treated mice on  
248 day 1 of infection, whereas *Bacteroides* #3, *Bacteroides* #9, and *Parabacteroides* #1  
249 were enriched during the later stages of infection. These results demonstrate that return  
250 towards the baseline microbiome configuration correlates with restoration of members  
251 of multiple phyla (*Bacteroidetes*, *Firmicutes* and *Actinobacteria*) whereas continued  
252 disruption correlates increased abundance of *Bacteroides* OTUs and a  
253 *Peptostreptococcaceae* OTU that is likely *C. difficile*.

254  
255 ***Bacteria from simplified communities persist in the feces of treated mice.*** We  
256 tracked the fate of OTUs present in *in vitro*-cultured simplified communities over time in  
257 mice treated with simplified communities. On day 1 following infection, ~60% of OTUs  
258 present in *in vitro*-cultured simplified communities could be detected in the feces of  
259 treated mice (Fig 7A-B). Levels of simplified community OTUs decreased over time,  
260 with the lowest percentage (~21%) detected on relapse day 0. Following induction of  
261 relapse, the number of OTUs detected from the original *in vitro*-cultured simplified  
262 communities increased to ~53%. These results indicate that these OTUs had likely  
263 persisted below the level of detection and re-emerged when other OTUs declined

264 following clindamycin treatment. OTUs that persisted over time were phylogenetically  
265 diverse (Fig. 7C). High levels of a *Phascolarctobacterium* OTU (#22) and three  
266 *Bacteroides* OTUs (#3, #11, #16) were detected across all community-treated mice  
267 indicating that these bacteria likely engrafted well.

268  
269 The trend for preservation of OTUs from simplified communities followed a different  
270 trajectory in FS2A-treated mice. The percent of FS2A OTUs detected increased to 77%  
271 on day 4/5 and returned to 54% on day 7 (Fig. 7A); values were significantly higher than  
272 those observed in mice treated with other simplified communities (Fig. 7B). Consistent  
273 with this observation, several *Bacteroides* OTUs present in *in vitro* cultures of all four  
274 simplified communities were only detected in the feces of FS2A-treated mice on day 7.  
275 This increased persistence of OTUs from FS2A was also consistent with the delayed  
276 return to baseline microbiome composition observed in these mice (Fig. 5C).

277  
278 **Bacteria originating from simplified communities re-emerge during relapse.** We  
279 investigated the microbiome changes were associated with relapse and determined that  
280 ~70% of OTUs enriched in the feces of SC2, FS2C and FS2B-treated mice on relapse  
281 day 2 likely originated from the *in vitro*-cultured simplified communities (Fig. 8).  
282 Approximately 20% of OTUs enriched on relapse day 2 were enriched on day 1 of  
283 infection, indicating that the response to relapse was not identical to the initial disruption  
284 but shared some similarities.

285

286 **Discussion**

287 We described a new pipeline for identifying and rigorously testing simplified  
288 communities with the ability to provide protection from *C. difficile* infection (summarized  
289 in Fig. S4). We identified 24 new simplified communities with the ability to inhibit *C.*  
290 *difficile in vitro*. Several of the OTUs detected in these simplified communities were  
291 classified into family (*Lachnospiraceae*, *Ruminococcaceae*, *Clostridiaceae*,  
292 *Bacteroidaceae*) and genera (*Bacteroides*, *Clostridium* XIVa, *Anaerostipes*,  
293 *Coprococcus*, *Dorea*, *Roseburia*, *Blautia*) found depleted in the fecal microbiomes of  
294 people who are susceptible to *C. difficile* and restored following FMT treatment (42-46).  
295 In contrast, some OTUs were classified into families less often linked to resistance to *C.*  
296 *difficile* colonization (e.g., *Veionella*, *Eggerthella*, *Clostridium* XVIII, *Acidaminococcus*)  
297 or more correlated with susceptibility to *C. difficile* infection (*Enterococcus*,  
298 *Streptococcus*, *Escherichia/Shigella*). Thus, the approach we described leads to  
299 communities distinct from those based upon predictive ecological modeling and may  
300 provide additional insights into *C. difficile* colonization resistance.

301  
302 By testing simplified communities in a <sup>H<sub>M</sub>b</sup>mouse model, we determined that only a  
303 subset of the tested communities conferred protection *in vivo*. Treatment with SC1,  
304 SC2, FS2B, and FS2C significantly reduced the initial body mass loss associated with  
305 severe disease and decreased *C. difficile* loads early in infection, similar to treatment  
306 with <sup>H<sub>M</sub>b</sup>mouse FMT. While the magnitude of effects varied, we observed a significant  
307 negative correlation between *C. difficile* levels on day 1 of infection and body mass on  
308 day 2 of infection (Fig. S5), with lower levels of *C. difficile* on day 1 predictive of reduced  
309 body mass loss on day 2 of infection. Thus, a potential mechanism for simplified

310 communities to limit the severity of CDI *in vivo* is by delaying the germination or  
311 outgrowth of *C. difficile* spores. Similar reductions in *C. difficile* levels on day 1 following  
312 infection coupled to ~50% reduction in body mass loss were reported by Buffie et al (47)  
313 when mice were treated with a consortia of four strains. In this case, early reductions in  
314 *C. difficile* levels were linked with restoration of secondary bile acid production by  
315 *Clostridium scindens*, as well as unknown functions contributed by other members of  
316 the simple community. Delaying germination or outgrowth could prevent severe disease  
317 by altering the dynamics of the host immune response between pro-inflammatory  
318 responses known to cause disease and anti-inflammatory responses that provide  
319 protection from *C. difficile* epithelial damage (21, 48, 49).

320

321 Comparison of microbiome changes in the feces of mice treated with communities that  
322 limit (FS2C, SC2, <sup>HMb</sup>mouse FMT), partially limit (FS2B) or fail to limit (FS2A, PBS)  
323 CDAD may explain some of the observed differences in disease progression. Treatment  
324 with FS2C, SC2 or <sup>HMb</sup>mouse FMT significantly limited body mass loss and altered the  
325 levels of *C. difficile* shedding; these communities also exhibited a more rapid return  
326 towards the baseline microbiome configuration observed in <sup>HMb</sup>mice not treated with  
327 antibiotics. Return towards baseline was associated with increased abundance of  
328 members of the endogenous microbiome, including several *Porphyromonadaceae*  
329 OTUs. *Porphyromonadaceae* were found to be depleted in the feces of humans and  
330 mice susceptible to *C. difficile* (50, 51). Enhanced restoration of endogenous microbes  
331 observed in FS2C and SC2-treated mice could be due to restoration of syntrophic  
332 interactions between endogenous microbes and those found in simplified communities



333 and/or suppression of factors (*C. difficile* metabolism (52), innate immune activation  
334 (53)) that promote microbiome disruption.

335  
336 Mice treated with FS2B, a treatment that limited body mass loss during initial infection  
337 but did not significantly alter *C. difficile* shedding in feces, exhibited a slower return to  
338 baseline microbiome conditions, suggesting that a return to baseline microbiome  
339 conditions could be important for *C. difficile* clearance but may not be required to  
340 mitigate initial disease severity. Treatment with FS2A, the simplified community  
341 treatment that failed to provide protection *in vivo*, was associated with significantly lower  
342 levels of restoration of endogenous microbes. Previous reports have indicated that  
343 specific probiotic formulations can delay the return to a non-disrupted microbiome  
344 configuration due to suppression of endogenous microbes (54); this could also be true  
345 for FS2A-treated mice. Further studies are needed to evaluate these hypotheses.

346  
347 We also found that a subset of OTUs that originated from simplified communities  
348 persisted over time in the feces of treated mice. While abundance of these OTUs  
349 diminished over time, continued colonization was demonstrated following induction of  
350 relapse. Persistence of these simplified community OTUs likely played a key role in  
351 limiting susceptibility to recurrent disease. One OTU of note was  
352 *Phascolarctobacterium*. A recent study demonstrated that administration of  
353 *Phascolarctobacterium* species to cefoperazone-treated mice reduces mortality,  
354 possibly by competing with *C. difficile* for succinate in the disrupted GI tract (55). Other  
355 OTUs of note include those classified as *Blautia*, *Ruminococcaceae*, and

356 *Eisenbergiella*. Colonization with members of the *Ruminococcaceae* family and  
357 *Eisenbergiella* and *Blautia* genera was correlated with a 60% reduced risk for CDI in  
358 allogenic hematopoietic stem cell patients (56). Our results are also consistent with a  
359 previous study of microbiome restoration following FMT in human patients that found a  
360 balance between engraftment of donor bacteria, persistence of bacteria present in the  
361 feces of infected patients, and emergence of previously undetected bacteria ((57).

362

363 Dilution-extinction provided a rapid way to screen communities for the ability to prevent  
364 *C. difficile* infection. Development of diverse treatment consortia for CDI is important as  
365 *C. difficile* is known to fill different nutritional niches (58) and fecal transplant studies  
366 indicate differential engraftment of species between patients treated with the same fecal  
367 sample (59). However, further refinement is needed before communities progress to  
368 clinical testing. Isolation of individual strains from simplified communities prior to  
369 community reassembly and efficacy testing will ensure the identity of the treatment  
370 consortia. In spite of these limitations, the approaches outlined in this study represent a  
371 significant advance in the throughput of testing for simplified communities to limit *C.*  
372 *difficile* infection and could potentially be adapted to identify simplified communities to  
373 treat other diseases linked to microbiome disruption.

374

## 375 **Methods**

376 *Fecal samples, bacterial strains, and cultivation conditions.* Fecal samples were  
377 provided by anonymous subjects between the ages of 25-64 who self-identified as  
378 healthy and had not consumed antibiotics for at least 2 months or probiotics for at least

379 2 days prior to donation. Fecal samples were prepared as described (60). The  
380 previously described ribotype 027 isolate *C. difficile* 2015 was used for all experiments  
381 (60). All cultivation was performed at 37°C under an atmosphere of 5% H<sub>2</sub>, 5% CO<sub>2</sub>,  
382 and 90% N<sub>2</sub>.

383

384 *Identification of simplified communities through dilution/extinction.* Fecal samples were  
385 prepared and inoculated into MBRA containing bioreactor media 3 (BRM3) (61) as  
386 described (40). Fecal communities equilibrated for 16 hr in batch growth containing  
387 before initiation of continuous flow at a flow rate of 1.875 ml/hr (8 hr retention time).  
388 After 5-6 days of flow, an aliquot was removed for determination of cell concentration  
389 through serial dilution and plating on BRM3 agar. After 8 days, a sample was removed  
390 from each reactor, diluted to final concentrations of ~3 X 10<sup>4</sup> cells/ml (10<sup>-4</sup> dilution) or 3  
391 X 10<sup>3</sup> cells/ml (10<sup>-5</sup> dilution) in BRM3. 1 ml of each dilution was used to inoculate 5-6  
392 sterile bioreactors containing 15 ml of sterile BRM3/dilution. After 3 days under  
393 continuous flow, aliquots were removed from diluted communities for sequencing and  
394 for cryopreservation with 15% glycerol or 7.5% DMSO. One day later, communities  
395 were challenged with 10<sup>4</sup> *C. difficile* cells as described (60); *C. difficile* levels in reactors  
396 were determined through selective plating on TCCFA agar with 20 µg/ml erythromycin  
397 and 50 µg/ml rifampicin as described (60). For repeat cultivation from cryopreserved  
398 stocks, stocks were thawed and 300 µl were used to inoculate triplicate reactor vessels  
399 containing 15 ml of sterile BRM3. Communities were grown in batch for 16 hrs, then  
400 with continuous flow for four days prior to challenge with *C. difficile* as described above.

401

402 *Further simplification of simplified communities 1 (SC1) and 2 (SC2).* 1 ml stocks were  
403 thawed and used to inoculate an empty reactor vessel. Flow of sterile BRM3 was  
404 initiated and allowed to fill the reactor at a flow rate of 1.825 ml/hr. After continuous flow  
405 cultivation for three days, cell concentrations were determined as described above. Two  
406 days later, aliquots of cells were removed and diluted in sterile BRM3 to a final  
407 concentration of 250 cells/ml ( $10^{-6}$  dilution) or 25 cells/ml ( $10^{-7}$  dilution). 1 ml aliquots of  
408 cells were used to inoculate 5 ( $10^{-6}$  dilution) or 6 ( $10^{-7}$  dilution) empty, sterile reactors,  
409 which were allowed to fill with sterile media as described above. After two (SC2) or  
410 three (SC1) days of flow, aliquots were removed for sequence analysis and  
411 cryopreservation. One (SC1) or 15 (SC2) days later simplified communities were  
412 challenged with  $10^4$  vegetatively growing *C. difficile* cells and levels of *C. difficile*  
413 persisting in reactors over time were determined through selective plating.

414  
415 *Cultivation of simple communities for treatment of <sup>HMb</sup>mice.* 65 ml bioreactors were  
416 prepared as previously described (62). Sterile, empty bioreactors were inoculated with 1  
417 ml of thawed stocks and allowed to fill with sterile BRM3 medium at a flow rate of 8.125  
418 ml/hr . Communities were cultured with flow for 6-8 days before 10 ml aliquots of culture  
419 were removed, centrifuged at 800 X g for 10 min and resuspended in 1 ml anaerobic  
420 phosphate buffered saline for delivery to mice. Cell densities of reactor communities  
421 were determined through selective plating on BRM3 agar; mice received doses of cells  
422 ranging from  $5 \times 10^8$  –  $2 \times 10^9$  cells freshly prepared from reactors on three subsequent  
423 days.

424

425 *Preparation of <sup>HMb</sup>mouse FMT and human FMT material.* Fecal samples were collected  
426 from 6-10 week-old male and female mice, pooled and resuspended in anaerobic PBS  
427 at 20% w/v. Samples were vortexed for 5 min, then centrifuged at 200 X g for 2 min.  
428 Each mice was treated with 100  $\mu$ l of fecal slurry. Our human FMT preparation was  
429 prepared as described (63).

430  
431 *Treatment of <sup>HMb</sup>mice with PBS, human FMT, <sup>HMb</sup>mouse FMT or simplified communities.*

432 As outlined in Fig. 3A, antibiotics (60) were administered in the drinking water to 6-10  
433 week-old male and female mice. Mice were treated with 100  $\mu$ l of PBS, <sup>HMb</sup>mouse FMT,  
434 human FMT or cells from simplified communities via orogastric gavage on three  
435 subsequent days. Clindamycin (10 mg/kg) was administered via intraperitoneal  
436 injection. Mice were challenged with  $5 \times 10^4$  spores of *C. difficile* 2015. Three mouse  
437 experiments were performed. Mice in experiment 1 were treated with PBS, <sup>HMb</sup>mouse  
438 FMT, human FMT, or SC1-SC4 (n=9 mice/treatment group except SC4 (n=8)). Mice in  
439 experiment 2 were treated with PBS, <sup>HMb</sup>mouse FMT or SC2, FS2A, or FS2B (n=9  
440 mice/treatment group except PBS (n=10)). Mice in experiment 3 were treated with PBS,  
441 <sup>HMb</sup>mouse FMT or SC2, FS2B, or FS2C (n=8 mice/treatment group). In experiments 1  
442 and 2, ~100  $\mu$ l of inoculum from the 3rd treatment was saved for sequencing. Mouse  
443 body mass was collected daily from days 0-5 following *C. difficile* challenge then  
444 periodically following resolution of severe disease as indicated in figures. Mice that lost  
445 greater than 20% body mass from day 0 or showed signs of severe disease as  
446 previously described (41) were euthanized. Mouse body mass was also collected on  
447 day -2 and day -1 in experiment 1. Relapse was induced 24 (experiment 3), 28

448 (experiment 1) or 33 (experiment 2) days following initial *C. difficile* infection through IP  
449 administration of clindamycin (10 mg/kg). *C. difficile* levels in fecal samples were  
450 determined through selective plating (experiment 1) or qPCR (experiments 2 and 3) as  
451 described (60) at the time points indicated in the text.

452  
453 *Analysis of microbial communities through 16S rRNA gene sequencing.* Nucleic acids  
454 were extracted from mouse fecal samples and inoculum samples using the DNeasy  
455 Powersoil HTP Kit (QIAGEN) and from the further simplified SC2 samples using the  
456 Powermag Microbiome kit (MoBio). The V4 region of the 16S rRNA gene was amplified  
457 from purified DNA or directly from lysed bioreactor samples in triplicate using dual or  
458 single indexed primers F515/R806 as described (40, 64). Samples were cleaned  
459 quantified and pooled in equimolar concentrations prior to sequencing using the Illumina  
460 MiSeq v2 2 X 250 kit as described (40).

461  
462 All sequence analysis was performed using mothur version 1.35.1. Raw sequencing  
463 reads were quality-filtered, aligned to the V4 region of Silva 16S rRNA reference release  
464 132, pre-clustered into sequence groups with <1% sequence divergence, filtered to  
465 remove chimeras with uchime, and classified with the Bayesian classifier using rdp  
466 database version 16 ( $\geq 80\%$  confidence threshold) as previously described with the  
467 modifications noted above (40, 65). Sequences were then rarefied to remove those with  
468  $\leq 10$  reads. Pairwise distance matrices were calculated and sequences were clustered  
469 into OTUs with  $\geq 97$  and  $\geq 99\%$  ANI. OTUs were classified by the majority consensus rdp  
470 taxonomy within the OTU. To better determine the potential identity of

471 *Peptostreptococcaceae* OTU #31 ( $\geq 97\%$  ANI) and *Peptostreptococcaceae* OTU #35 ( $\geq$   
472 99% ANI), representative sequences from these OTUs were compared to the nr/nt  
473 database using BLAST.

474  
475 Samples were randomly subsampled to 10,000 sequences before determination of  
476 alpha and beta diversity measures. Alpha diversity measures (number of observed  
477 OTUs, inverse Simpson measure of microbial diversity, Simpson even measure of  
478 evenness) were calculated using mothur. Principle Coordinates Analysis of Bray-Curtis  
479 dissimilarities between communities were calculated and ordines were visualized  
480 using the Phyloseq package (version 1.30.0 (66)) running in R version 3.61. Statistical  
481 significance of clusters were calculated with permutational ANOVA (ADONIS function of  
482 vegan version 2.5-6 (40)). Identification of OTUs significantly enriched between  
483 treatment groups was determined using the mothur-implementation of LEfSe (40, 65).  
484 Mothur was also used to calculate the Bray-Curtis dissimilarities between treated mice  
485 and the baseline <sup>HMb</sup>mouse sample (similarity= 1-Bray-Curtis dissimilarity).

486 *Ethics statement.* Protocols for fecal sample collection were reviewed and approved by  
487 the Institutional Review Boards of Michigan State University and Baylor College of  
488 Medicine. Animal use was reviewed and approved by the Institutional Animal Care and  
489 Use Committee at Baylor College of Medicine (protocol number AN-6675)

490 *Data visualization and statistical analysis.* Unless otherwise noted, data was visualized  
491 and statistical analysis was performed using Prism v8.

492

493 *Data availability.* 16S rRNA gene sequence data has been deposited in the sequence  
494 read archive ((66)) with accession numbers XXX.

495

## 496 **Acknowledgements**

497 This work was supported by funding from the National Institutes of Allergy and  
498 Infectious Disease (AI12152201) to RAB and from the Nebraska Tobacco Settlement  
499 Biomedical Research Development Fund to JMA. Analysis was completed utilizing the  
500 Holland Computing Center, which receives support from the Nebraska Research  
501 Initiative. RAB receives unrestricted research support from BioGaia, AB, consults for  
502 Takeda and Probiotech, serves on the scientific advisory board of Tenza, and is a co-  
503 founder of Mikrovia.

504

505

506 The authors thank T. Savidge (Texas Children's Microbiome Center, Baylor College of  
507 Medicine) for providing the human FMT sample.

508

## 509 **References**

- 510 1. Lessa FC, Winston LG, McDonald LC, Emerging Infections Program C. difficile  
511 Surveillance Team. 2015. Burden of *Clostridium difficile* infection in the United  
512 States. N Engl J Med 372:2369–2370.
  
- 513 2. Miller BA, Chen LF, Sexton DJ, Anderson DJ. 2011. Comparison of the Burdens  
514 of Hospital-Onset, Healthcare Facility–Associated *Clostridium difficile* Infection  
515 and of Healthcare-Associated Infection due to Methicillin-Resistant



- 516            *Staphylococcus aureus* in Community Hospitals. Infect Control Hosp Epidemiol  
517            32:387–390.
- 518    3.    Wiström J, Norrby SR, Myhre EB, Eriksson S, Granström G, Lagergren L,  
519            Englund G, Nord CE, Svenungsson B. 2001. Frequency of antibiotic-associated  
520            diarrhoea in 2462 antibiotic-treated hospitalized patients: a prospective study. J  
521            Antimicrob Chemother 47:43–50.
- 522    4.    Dubberke ER, Olsen MA. 2012. Burden of *Clostridium difficile* on the Healthcare  
523            System. Clin Infect Dis 55:S88–S92.
- 524    5.    Bagdasarian N, Rao K, Malani PN. 2015. Diagnosis and treatment of *Clostridium*  
525            *difficile* in adults: a systematic review. JAMA 313:398–408.
- 526    6.    Johnson S. 2009. Recurrent *Clostridium difficile* infection: A review of risk factors,  
527            treatments, and outcomes. J Infect 58:403–410.
- 528    7.    Wilcox MH, Ahir H, Coia JE, Dodgson A, Hopkins S, Llewelyn MJ, Settle C,  
529            Mclain-Smith S, Marcella SW. 2017. Impact of recurrent *Clostridium difficile*  
530            infection: hospitalization and patient quality of life. J Antimicrob Chemother  
531            72:2647–2656.
- 532    8.    Shah DN, Aitken SL, Barragan LF, Bozorgui S, Goddu S, Navarro ME, Xie Y,  
533            DuPont HL, Garey KW. 2016. Economic burden of primary compared with  
534            recurrent *Clostridium difficile* infection in hospitalized patients: a prospective  
535            cohort study. J Hosp Infect 93:286–289.

- 536 9. Sorg JA, Sonenshein AL. 2008. Bile salts and glycine as cogerminants for  
537 *Clostridium difficile* spores. J Bacteriol 190:2505–2512.
- 538 10. Howerton A, Ramirez N, Abel-Santos E. 2011. Mapping interactions between  
539 germinants and *Clostridium difficile* spores. J Bacteriol 193:274–282.
- 540 11. Ng KM, Ferreyra JA, Higginbottom SK, Lynch JB, Kashyap PC, Gopinath S,  
541 Naidu N, Choudhury B, Weimer BC, Monack DM, Sonnenburg JL. 2013.  
542 Microbiota-liberated host sugars facilitate post-antibiotic expansion of enteric  
543 pathogens. Nature 502:96–99.
- 544 12. Theriot CM, Koenigsnecht MJ, Carlson PE, Hatton GE, Nelson AM, Li B,  
545 Huffnagle GB, Z Li J, Young VB. 2014. Antibiotic-induced shifts in the mouse gut  
546 microbiome and metabolome increase susceptibility to *Clostridium difficile*  
547 infection. Nat Commun 5:3114.
- 548 13. Wilson KH, Perini F. 1988. Role of competition for nutrients in suppression of  
549 *Clostridium difficile* by the colonic microflora. Infect Immun 56:2610–2614.
- 550 14. Rolfe RD. 1984. Role of volatile fatty acids in colonization resistance to  
551 *Clostridium difficile*. Infect Immun 45:185–191.
- 552 15. May T, Mackie RI, Fahey GC, Cremin JC, Garleb KA. 1994. Effect of fiber source  
553 on short-chain fatty acid production and on the growth and toxin production by  
554 *Clostridium difficile*. Scand J Gastroenterol 29:916–922.

- 555 16. Rea MC, Sit CS, Clayton E, O'Connor PM, Whittall RM, Zheng J, Vederas JC,  
556 Ross RP, Hill C. 2010. Thuricin CD, a posttranslationally modified bacteriocin with  
557 a narrow spectrum of activity against *Clostridium difficile*. Proc Natl Acad Sci USA  
558 107:9352–9357.
- 559 17. Mathur H, Rea MC, Cotter PD, Ross RP, Hill C. 2014. The potential for emerging  
560 therapeutic options for *Clostridium difficile* infection. Gut Microbes 5:696–710.
- 561 18. Rea MC, Dobson A, O'Sullivan O, Crispie F, Fouhy F, Cotter PD, Shanahan F,  
562 Kiely B, Hill C, Ross RP. 2011. Effect of broad-and narrow-spectrum  
563 antimicrobials on *Clostridium difficile* and microbial diversity in a model of the  
564 distal colon. Proc Natl Acad Sci U S A 108:4639–4644.
- 565 19. Péchiné S, Collignon A. 2016. Immune responses induced by *Clostridium difficile*.  
566 Anaerobe 41:68–78.
- 567 20. Madan R, Petri WA Jr. 2012. Immune responses to *Clostridium difficile* infection.  
568 Trends Mol Med 18:658–666.
- 569 21. Saleh MM, Petri WA Jr. 2019. Type 3 immunity during *Clostridioides difficile*  
570 infection: too much of a good thing? Infect Immun 88:e00306–19.
- 571 22. Buffie CG, Bucci V, Stein RR, McKenney PT, Ling L, Gobourne A, No D, Liu H,  
572 Kinnebrew M, Viale A, Littmann E, van den Brink MRM, Jenq RR, Taur Y, Sander  
573 C, Cross JR, Toussaint NC, Xavier JB, Pamer EG. 2014. Precision microbiome  
574 reconstitution restores bile acid mediated resistance to *Clostridium difficile*. Nature  
575 517:205–208.

- 576 23. Theriot CM, Bowman AA, Young VB. 2016. Antibiotic-Induced Alterations of the  
577 Gut Microbiota Alter Secondary Bile Acid Production and Allow for *Clostridium*  
578 *difficile* Spore Germination and Outgrowth in the Large Intestine. *mSphere*  
579 1:e00045–15.
- 580 24. Dethlefsen L, Relman DA. 2011. Incomplete recovery and individualized  
581 responses of the human distal gut microbiota to repeated antibiotic perturbation.  
582 *Proc Natl Acad Sci USA* 108 Suppl 1:4554–4561.
- 583 25. Dethlefsen L, Huse S, Sogin ML, Relman DA. 2008. The pervasive effects of an  
584 antibiotic on the human gut microbiota, as revealed by deep 16S rRNA  
585 sequencing. *PLoS Biol* 6:e280.
- 586 26. Young VB, Schmidt TM. 2004. Antibiotic-associated diarrhea accompanied by  
587 large-scale alterations in the composition of the fecal microbiota. *J Clin Microbiol*  
588 42:1203–1206.
- 589 27. Slimings C, Riley TV. 2014. Antibiotics and hospital-acquired *Clostridium difficile*  
590 infection: update of systematic review and meta-analysis. *J Antimicrob Chemother*  
591 69:881–891.
- 592 28. Deshpande A, Pasupuleti V, Thota P, Pant C, Rolston DDK, Sferra TJ,  
593 Hernandez AV, Donskey CJ. 2013. Community-associated *Clostridium difficile*  
594 infection and antibiotics: a meta-analysis. *J Antimicrob Chemother* 68:1951–1961.

- 595 29. Vardakas KZ, Trigkidis KK, Boukouvala E, Falagas ME. 2016. *Clostridium difficile*  
596 infection following systemic antibiotic administration in randomised controlled  
597 trials: a systematic review and meta-analysis. *Int J Antimicrob Agents* 48:1–10.
- 598 30. Brown KA, Khanafer N, Daneman N, Fisman DN. 2013. Meta-Analysis of  
599 Antibiotics and the Risk of Community-Associated *Clostridium difficile* Infection.  
600 *Antimicrob Agents Chemother* 57:2326–2332.
- 601 31. Guery PBG, Menichetti PFM, Veli-Jukka V-JA, Adomakoh NA, Aguado PJMA,  
602 Bisnauthsing KB, Georgopali AG, Goldenberg SDG, Karas AK, Kazeem GK,  
603 Longshaw CL, Palacios-Fabrega JAP-F, Cornely POAC, Vehreschild MJGTV,  
604 EXTEND Clinical Study Group ECS. 2017. Extended-pulsed fidaxomicin versus  
605 vancomycin for *Clostridium difficile* infection in patients 60 years and older  
606 (EXTEND): a randomised, controlled, open-label, phase 3b/4 trial. *Lancet Infect*  
607 *Dis* 1–12.
- 608 32. Wilcox MH, Gerding DN, Poxton IR, Kelly C, Nathan R, Birch T, Cornely OA,  
609 Rahav G, Bouza E, Lee C, Jenkin G, Jensen W, Kim Y-S, Yoshida J, Gabryelski  
610 L, Pedley A, Eves K, Tipping R, Guris D, Kartsonis N, Dorr M-B, MODIFY I and  
611 MODIFY II Investigators. 2017. Bezlotoxumab for Prevention of Recurrent  
612 *Clostridium difficile* Infection. *N Engl J Med* 376:305–317.
- 613 33. Jiang ZD, Ajami NJ, Petrosino JF, Jun G, Hanis CL, Shah M, Hochman L,  
614 Ankoma-Sey V, DuPont AW, Wong MC, Alexander A, Ke S, DuPont HL. 2017.  
615 Randomised clinical trial: faecal microbiota transplantation for recurrent  
616 *Clostridium difficile* infection - fresh, or frozen, or lyophilised microbiota from a

- 617 small pool of healthy donors delivered by colonoscopy. *Aliment Pharmacol Ther*  
618 45:899–908.
- 619 34. Rajasingham R, Enns EA, Khoruts A, Vaughn BP. 2019. Cost-effectiveness of  
620 Treatment Regimens for *Clostridioides difficile* Infection: An Evaluation of the  
621 2018 Infectious Diseases Society of America Guidelines. *Clin Infect Dis* 372:825–  
622 9.
- 623 35. Tan X, Johnson S. 2019. Fecal microbiota transplantation (FMT) for *C. difficile*  
624 infection, just say 'No'. *Anaerobe* 60:102092.
- 625 36. Tvede M, Rask-Madsen J. 1989. Bacteriotherapy for chronic relapsing *Clostridium*  
626 *difficile* diarrhoea in six patients. *Lancet* 1:1156–1160.
- 627 37. Petrof EO, Gloor GB, Vanner SJ, Weese SJ, Carter D, Daigneault MC, Brown  
628 EM, Schroeter K, Allen-Vercoe E. 2013. Stool substitute transplant therapy for the  
629 eradication of *Clostridium difficile* infection: “RePOOPulating” the gut. *Microbiome*  
630 1:3.
- 631 38. Garland JL, Lehman RM. 1999. Dilution/extinction of community phenotypic  
632 characters to estimate relative structural diversity in mixed communities. *FEMS*  
633 *Microbiol Ecol* 30:333–343.
- 634 39. Franklin RB, Garland JL, Bolster CH, Mills AL. 2001. Impact of Dilution on  
635 Microbial Community Structure and Functional Potential: Comparison of  
636 Numerical Simulations and Batch Culture Experiments. *Appl Environ Microbiol*  
637 67:702–712.

- 638 40. Auchtung JM, Robinson CD, Britton RA. 2015. Cultivation of stable, reproducible  
639 microbial communities from different fecal donors using minibioreactor arrays  
640 (MBRAs). *Microbiome* 3:42.
- 641 41. Collins J, Auchtung JM, Schaefer L, Eaton KA, Britton RA. 2015. Humanized  
642 microbiota mice as a model of recurrent *Clostridium difficile* disease. *Microbiome*  
643 3:35.
- 644 42. Seekatz AM, Aas J, Gessert CE, Rubin TA, Saman DM, Bakken JS, Young VB.  
645 2014. Recovery of the gut microbiome following fecal microbiota transplantation.  
646 *mBio* 5:e00893–14.
- 647 43. Seekatz AM, Theriot CM, Rao K, Chang Y-M, Freeman AE, Kao JY, Young VB.  
648 2018. Restoration of short chain fatty acid and bile acid metabolism following fecal  
649 microbiota transplantation in patients with recurrent *Clostridium difficile* infection.  
650 *Anaerobe* 53:64–73.
- 651 44. Antharam VC, Li EC, Ishmael A, Sharma A, Mai V, Rand KH, Wang GP. 2013.  
652 Intestinal Dysbiosis and Depletion of Butyrogenic Bacteria in *Clostridium difficile*  
653 Infection and Nosocomial Diarrhea. *J Clin Microbiol* 51:2884–2892.
- 654 45. Staley C, Kaiser T, Vaughn BP, Graiziger C, Hamilton MJ, Kabage AJ, Khoruts A,  
655 Sadowsky MJ. 2019. Durable Long-Term Bacterial Engraftment following  
656 Encapsulated Fecal Microbiota Transplantation To Treat *Clostridium difficile*  
657 Infection. *mBio* 10:478–12.

- 658 46. Song Y, Garg S, Girotra M, Maddox C, Rosenvinge von EC, Dutta A, Dutta S,  
659 Fricke WF. 2013. Microbiota Dynamics in Patients Treated with Fecal Microbiota  
660 Transplantation for Recurrent *Clostridium difficile* Infection. PLoS ONE 8:e81330–  
661 11.
- 662 47. Buffie CG, Pamer EG. 2013. Microbiota-mediated colonization resistance against  
663 intestinal pathogens. Nat Rev Immunol 13:790–801.
- 664 48. Smits WK, Lyras D, Lacy DB, Wilcox MH, Kuijper EJ. 2016. *Clostridium difficile*  
665 infection. Nat Rev Dis Primers 2:390–47.
- 666 49. Sun X, Hirota SA. 2015. The roles of host and pathogen factors and the innate  
667 immune response in the pathogenesis of *Clostridium difficile* infection. Mol  
668 Immunol 63:193–202.
- 669 50. Schubert AM, Sinani H, Schloss PD. 2015. Antibiotic-Induced Alterations of the  
670 Murine Gut Microbiota and Subsequent Effects on Colonization Resistance  
671 against *Clostridium difficile*. mBio 6:e00974–15–10.
- 672 51. Schubert AM, Rogers MAM, Ring C, Mogle J, Petrosino JP, Young VB, Aronoff  
673 DM, Schloss PD. 2014. Microbiome Data Distinguish Patients with *Clostridium*  
674 *difficile* Infection and Non-*C. difficile*-Associated Diarrhea from Healthy Controls.  
675 mBio 5:1461–9.
- 676 52. Passmore IJ, Letertre MPM, Preston MD, Bianconi I, Harrison MA, Nasher F,  
677 Kaur H, Hong HA, Baines SD, Cutting SM, Swann JR, Wren BW, Dawson LF.



- 678 2018. Para-cresol production by *Clostridium difficile* affects microbial diversity and  
679 membrane integrity of Gram-negative bacteria. PLoS Pathog 14:e1007191–31.
- 680 53. Winter SE, Winter MG, Xavier MN, Thiennimitr P, Poon V, Kestra AM, Laughlin  
681 RC, Gomez G, Wu J, Lawhon SD, Popova IE, Parikh SJ, Adams LG, Tsohis RM,  
682 Stewart VJ, Baumler AJ. 2013. Host-Derived Nitrate Boosts Growth of *E. coli* in  
683 the Inflamed Gut. Science 339:708–711.
- 684 54. Suez J, Zmora N, Zilberman-Schapira G, Mor U, Dori-Bachash M, Bashardes S,  
685 Zur M, Regev-Lehavi D, Brik RB-Z, Federici S, Horn M, Cohen Y, Moor AE, Zeevi  
686 D, Korem T, Kotler E, Harmelin A, Itzkovitz S, Maharshak N, Shibolet O, Pevsner-  
687 Fischer M, Shapiro H, Sharon I, Halpern Z, Segal E, Elinav E. 2018. Post-  
688 Antibiotic Gut Mucosal Microbiome Reconstitution Is Impaired by Probiotics and  
689 Improved by Autologous FMT. Cell 174:1406–1423.e16.
- 690 55. Nagao-Kitamoto H, Leslie JL, Kitamoto S, Jin C, Thomsson KA, Gilliland MG,  
691 Kuffa P, Goto Y, Jenq RR, Ishii C, Hirayama A, Seekatz AM, Martens EC, Eaton  
692 KA, Kao JY, Fukuda S, Higgins PDR, Karlsson NG, Young VB, Kamada N. 2020.  
693 Interleukin-22-mediated host glycosylation prevents *Clostridioides difficile*  
694 infection by modulating the metabolic activity of the gut microbiota. Nat Med 1–25.
- 695 56. Lee YJ, Arguello ES, Jenq RR, Littmann E, Kim GJ, Miller LC, Ling L, Figueroa C,  
696 Robilotti E, Perales M-A, Barker JN, Giralt S, van den Brink MRM, Pamer EG,  
697 Taur Y. 2017. Protective Factors in the Intestinal Microbiome Against *Clostridium*  
698 *difficile* Infection in Recipients of Allogeneic Hematopoietic Stem Cell  
699 Transplantation. J INFECT DIS 215:1117–1123.

- 700 57. Smillie CS, Sauk J, Gevers D, Friedman J, Sung J, Youngster I, Hohmann EL,  
701 Staley C, Khoruts A, Sadowsky MJ, Allegretti JR, Smith MB, Xavier RJ, Alm EJ.  
702 2018. Strain Tracking Reveals the Determinants of Bacterial Engraftment in the  
703 Human Gut Following Fecal Microbiota Transplantation. *Cell Host Microbe*  
704 23:229–240.e5.
- 705 58. Jenior ML, Leslie JL, Young VB, Schloss PD. 2017. *Clostridium difficile* Colonizes  
706 Alternative Nutrient Niches during Infection across Distinct Murine Gut  
707 Microbiomes. *mSystems* 2:e00063–17–19.
- 708 59. Lee STM, Kahn SA, Delmont TO, Shaiber A, Esen ÖC, Hubert NA, Morrison HG,  
709 Antonopoulos DA, Rubin DT, Eren AM. 2017. Tracking microbial colonization in  
710 fecal microbiota transplantation experiments via genome-resolved metagenomics.  
711 *Microbiome* 5:50.
- 712 60. Robinson CD, Auchtung JM, Collins J, Britton RA. 2014. Epidemic *Clostridium*  
713 *difficile* strains demonstrate increased competitive fitness compared to  
714 nonepidemic isolates. *Infect Immun* 82:2815–2825.
- 715 61. Auchtung TA, Fofanova TY, Stewart CJ, Nash AK, Wong MC, Gesell JR,  
716 Auchtung JM, Ajami NJ, Petrosino JF. 2018. Investigating Colonization of the  
717 Healthy Adult Gastrointestinal Tract by Fungi. *mSphere* 3:153–16.
- 718 62. Auchtung JM, Robinson CD, Farrell K, Britton RA. 2016. MiniBioReactor Arrays  
719 (MBRAs) as a Tool for Studying *C. difficile* Physiology in the Presence of a  
720 Complex Community. *Methods Mol Biol* 1476:235–258.

- 721 63. Kellermayer R, Nagy-Szakal D, Harris RA, Luna RA, Pitashny M, Schady D, Mir  
722 SAV, Lopez ME, Gilger MA, Belmont J, Hollister EB, Versalovic J. 2015. Serial  
723 fecal microbiota transplantation alters mucosal gene expression in pediatric  
724 ulcerative colitis. *Am J Gastroenterol* 110:604–606.
- 725 64. Caporaso JG, Lauber CL, Walters WA, Berg-Lyons D, Huntley J, Fierer N, Owens  
726 SM, Betley J, Fraser L, Bauer M, Gormley N, Gilbert JA, Smith G, Knight R. 2012.  
727 Ultra-high-throughput microbial community analysis on the Illumina HiSeq and  
728 MiSeq platforms. *ISME J* 6:1621–1624.
- 729 65. Kozich JJ, Westcott SL, Baxter NT, Highlander SK, Schloss PD. 2013.  
730 Development of a Dual-Index Sequencing Strategy and Curation Pipeline for  
731 Analyzing Amplicon Sequence Data on the MiSeq Illumina Sequencing Platform.  
732 *Appl Environ Microbiol* 79:5112–5120.
- 733 66. McMurdie PJ, Holmes S. 2013. phyloseq: an R package for reproducible  
734 interactive analysis and graphics of microbiome census data. *PLoS ONE*  
735 8:e61217.
- 736

737 **Figures**

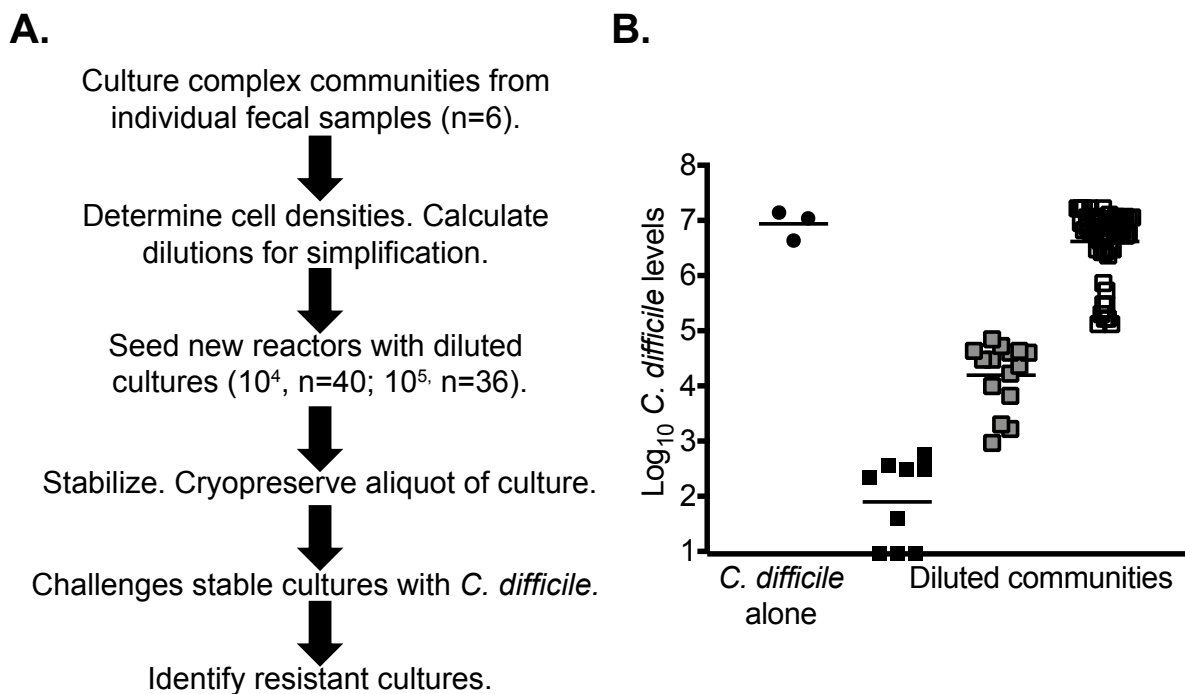

738

739 **Fig 1. Identification of simplified communities that inhibit *C. difficile* proliferation**

740 **through dilution/extinction community assembly.** (A) Overview of process to identify

741 simplified communities. (B) Log<sub>10</sub> *C. difficile* levels measured in diluted communities on

742 day 5/6 following challenge. Circles: cultures inoculated with *C. difficile* alone; Squares:

743 stable diluted communities that suppress *C. difficile* by >10,000-fold (black squares),

744 100-10,000 -fold(gray squares), or by <100-fold (open squares) compared to growth of

745 *C. difficile* alone. Lines represent the geometric means of the populations.

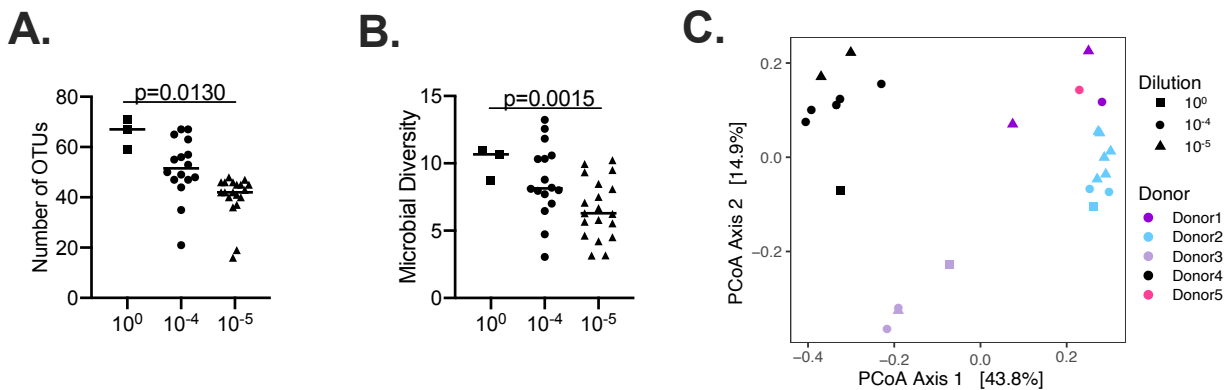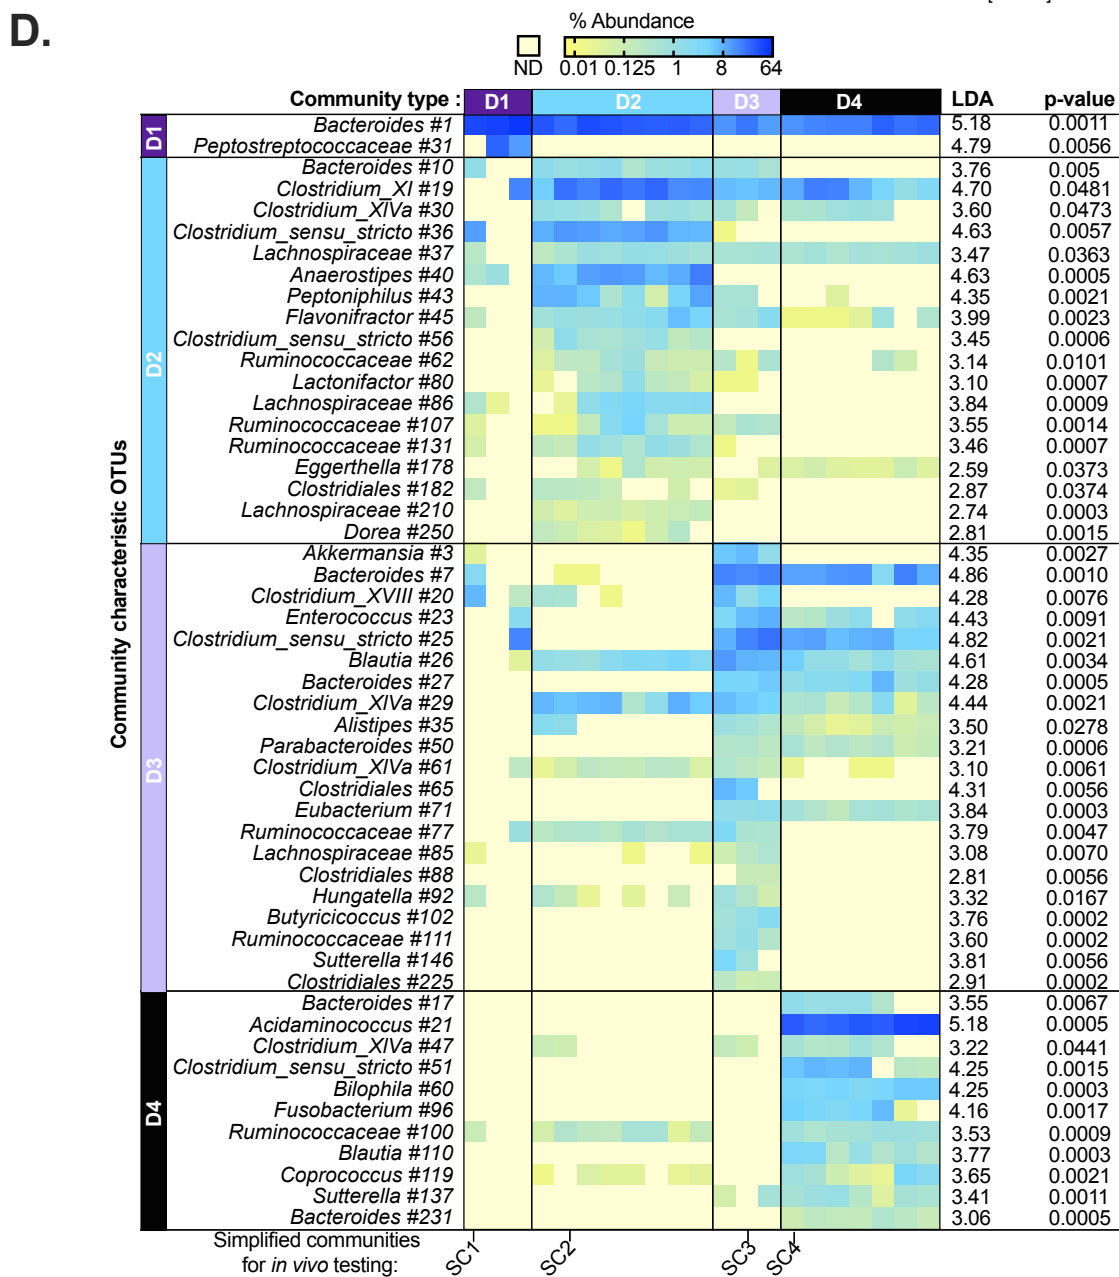

747 **Fig 2. Comparison of microbial communities present in complex fecal donor and**  
748 **simplified communities that inhibit *C. difficile* growth.** (A) The number of OTUs and  
749 (B) microbial diversity (Inverse Simpson) detected in complex communities from fecal  
750 donors ( $10^0$ , squares),  $10^{-4}$  (circles), and  $10^{-5}$  (triangles) diluted communities was  
751 plotted. Lines represent medians; p-values <0.05 as calculated by one-way Kruskal-  
752 Wallis testing with Dunn's correction for multiple comparisons are reported. (C) Principle  
753 Coordinates Analysis (PCoA) visualization of Bray-Curtis dissimilarities between  
754 complex communities from fecal donors ( $10^0$ , squares),  $10^{-4}$  (circles) and  $10^{-5}$  (triangles)  
755 diluted community samples. Colors represent different fecal donors as indicated.  
756 Percent of variation described by each axis indicated in parentheses. Permutational  
757 ANOVA provided strong support for segregation of simplified communities by fecal  
758 donor (F-statistic=13.44;  $R^2=0.73$ ; p-value=0.001). (D) Significant OTUs that  
759 differentiate between D1, D2, D3, and D4 diluted communities are organized by  
760 community for which they are characteristic as indicated. OTUs are classified to the  
761 lowest taxonomic level that could be confidently assigned ( $\geq 80\%$  confidence). The  
762 percent abundance of each OTU was plotted across all samples, which are arranged by  
763 donor community type as indicated at the top of the figure. Values ranged from 0.01%  
764 (yellow) to 64% (dark blue) of total sequences as indicated; pale yellow indicates no  
765 detected sequences (ND). LDA scores and p-values are indicated to the right of the  
766 heat map. The representative sequence for *Peptostreptococcaceae* #31 was 100%  
767 identical to *C. difficile* 16S rRNA. Diluted communities selected for *in vivo* testing are  
768 indicated in below the heat map (SC1 = D1, SC2=D2, SC3=D3, SC4=D4).

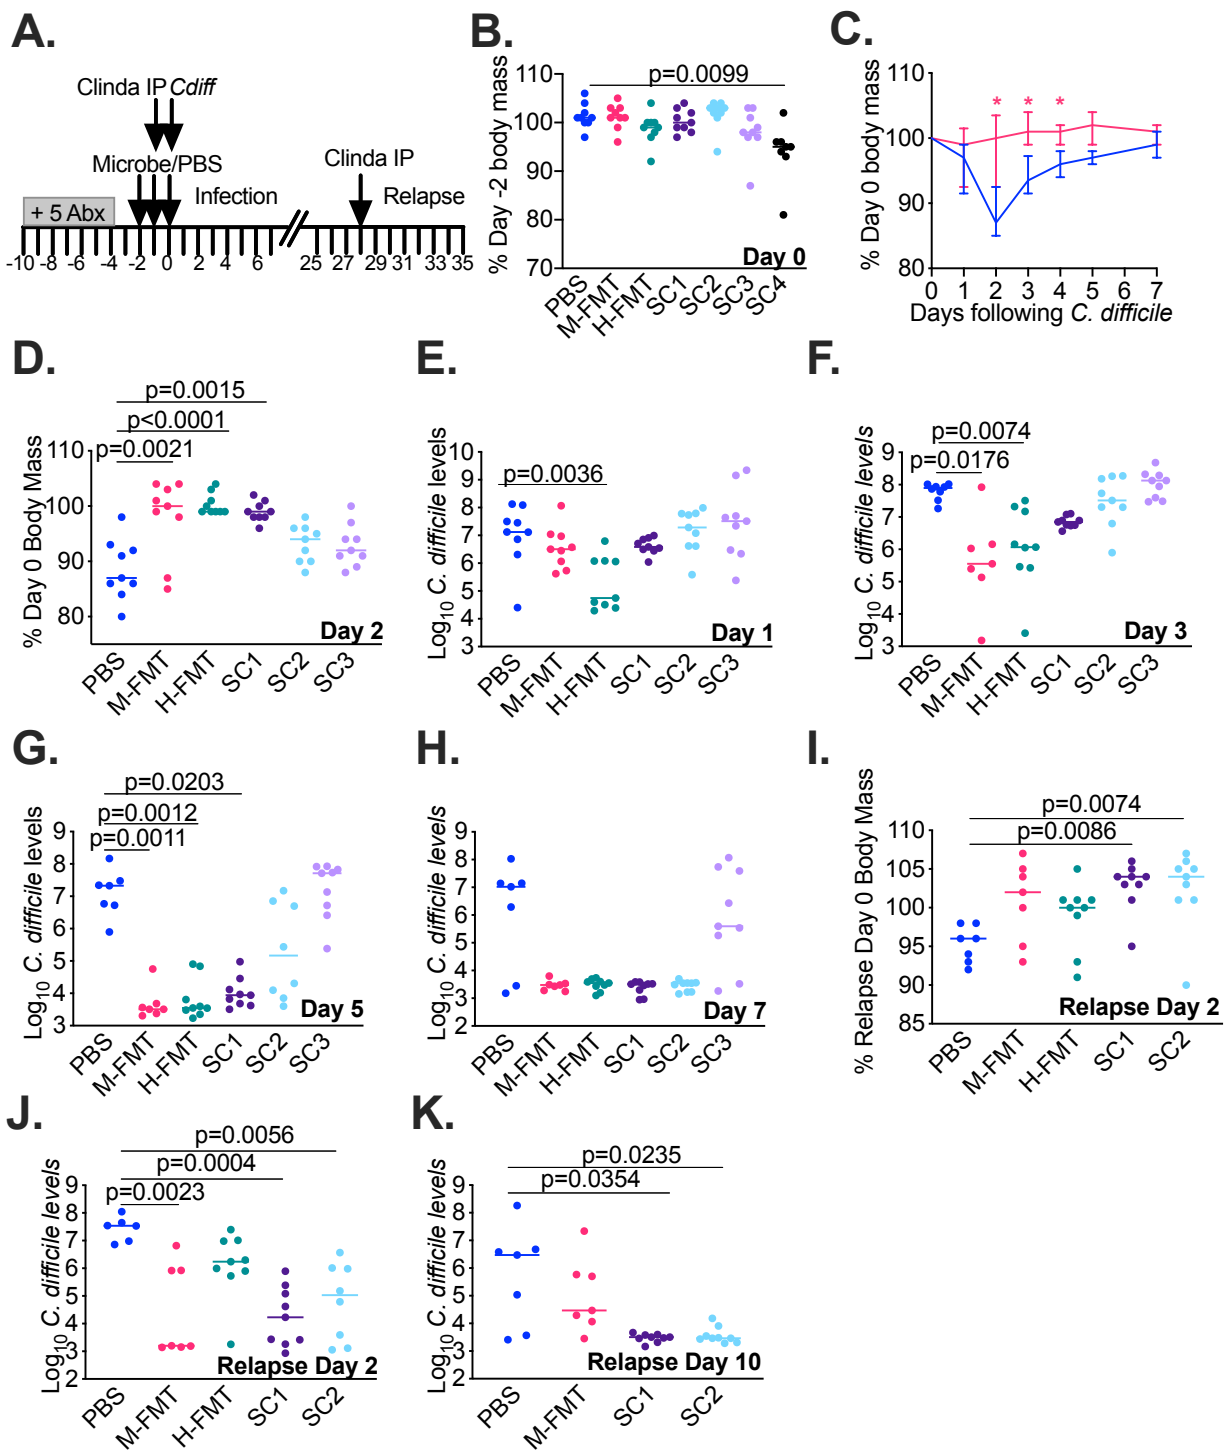

769  
 770 **Figure 3. SC1 and SC2 suppress *C. difficile*-associated disease in <sup>HMb</sup>mouse**  
 771 **model.** (A) Overview of infection and recurrence protocol used to evaluate simplified  
 772 communities and FMT treatments. In (B)-(K), treatments indicated below the axis. Lines

773 represent medians. Significance of differences between microbe and PBS-treated mice  
774 in each panel were evaluated with one-way Kruskal-Wallis testing with Dunn's  
775 correction for multiple comparisons. p-values less than 0.05 are reported. (B) Percent of  
776 day -2 body mass on day 0 (prior to *C. difficile* challenge) following two days of  
777 treatment with simplified communities. (C) Percent of day 0 body mass of PBS and M-  
778 FMT treated mice over the first seven days of infection. Lines represent medians, error  
779 bars represent interquartile ranges, and asterisks indicate p-values <0.05. (D) Percent  
780 of day 0 body mass on day 2 following initial infection. Levels of *C. difficile* measured in  
781 the feces of treated mice on (E) day 1, (F) day 3, (G) day 5, or (H) day 7 following  
782 infection. (I) Percent of relapse day 0 body mass on relapse day 2. Level of *C. difficile* in  
783 mouse feces on (J) relapse day 2, (K) relapse day 7 and (L) relapse day 10. Two mice  
784 lost from PBS (days 3 and 4) and <sup>HMb</sup>mouse FMT-treated groups (day 3) were included  
785 in calculations until death. Mice treated with SC3 were not tested for resistance to  
786 recurrent infection. *C. difficile* levels in H-FMT-treated mice were not tested on relapse  
787 day 10. Longitudinal data collected during initial infection and relapse are plotted in Fig.  
788 S2.



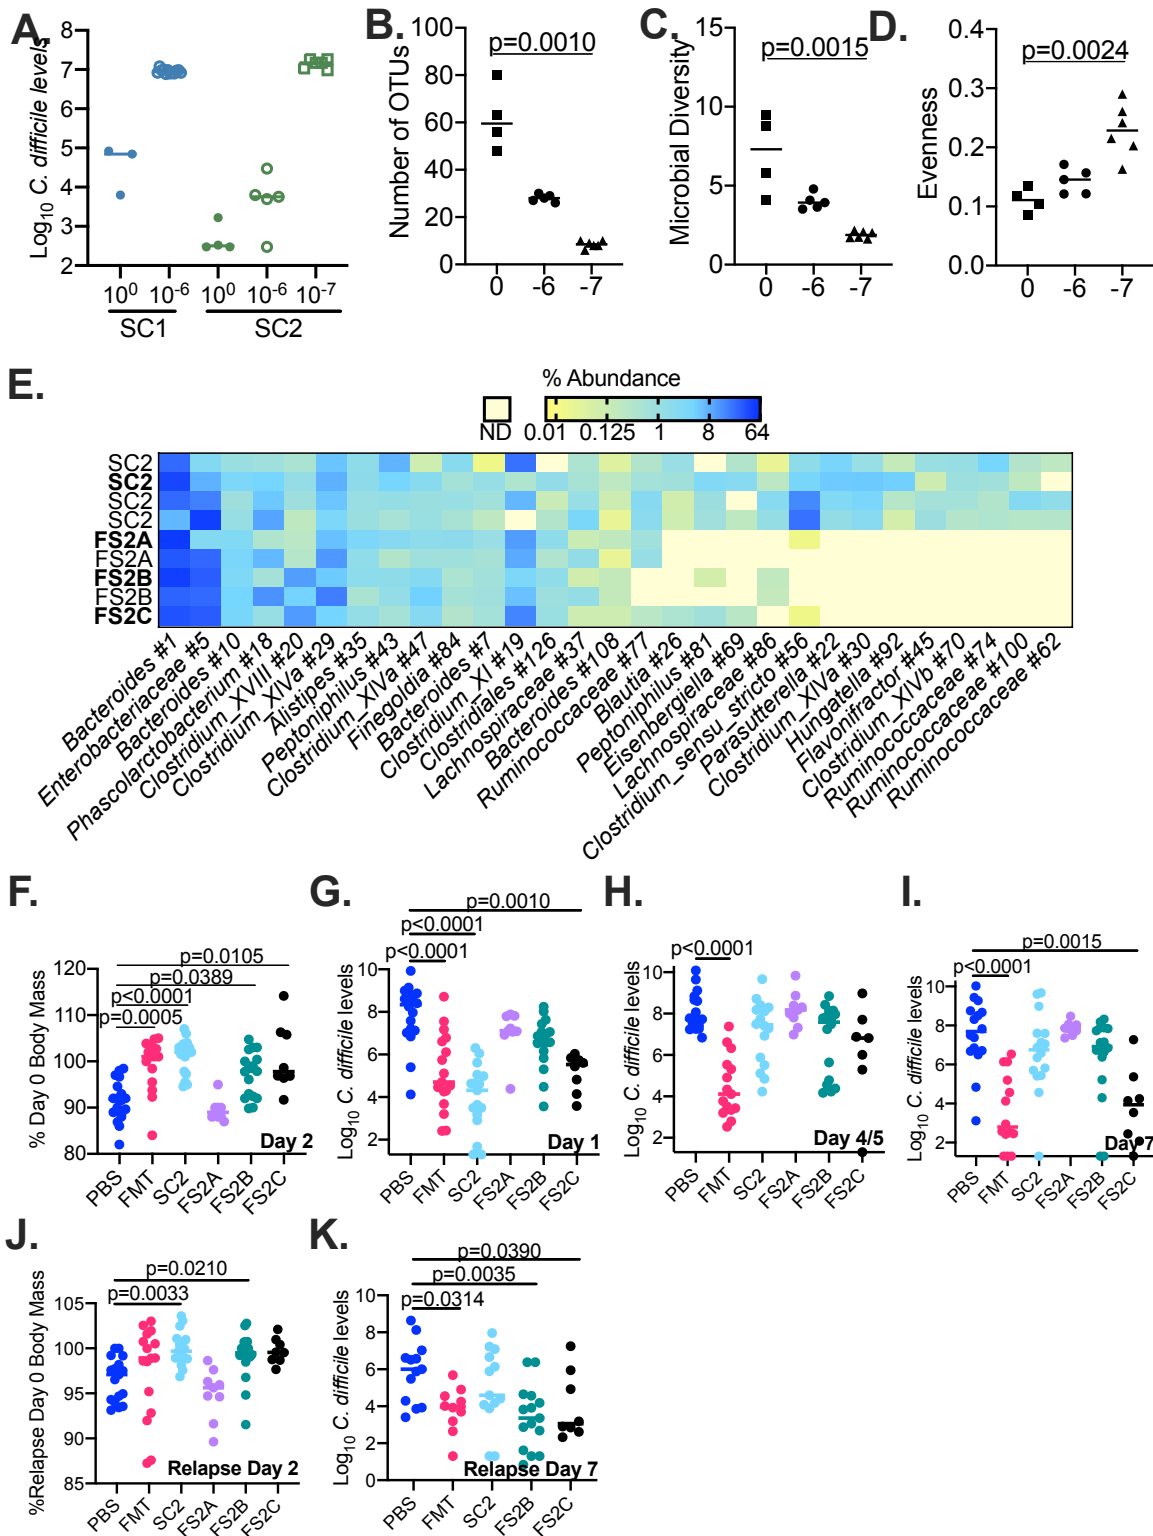

789

790 **Figure 4. Identification of further simplified microbial communities that suppress**

791 ***C. difficile* in MBRA and <sup>HMb</sup>mouse models of CDI. (A) Plot of  $\log_{10}$  *C. difficile* levels**

792 on final day in culture with re-cultured SC1 (closed blue circles) and SC2 (closed green  
793 circles) and in re-cultured SC1 and SC2 that were diluted  $10^{-6}$ -fold (open circles) and  
794  $10^{-7}$ -fold (open squares). Lines represent medians. (B) Number of OTUs, (C) Microbial  
795 Diversity (Inverse Simpson Index), and (D) Species Evenness (Simpson Evenness  
796 Index) of re-cultured SC2 and  $10^{-6}$  and  $10^{-7}$  diluted communities. Lines represent  
797 medians; any significant differences detected ( $p < 0.05$ ) in distributions of  $10^{-6}$  and  $10^{-7}$   
798 diluted communities compared to SC2 communities as determined by one-way Kruskal-  
799 Wallis testing with Dunn's correction for multiple comparisons are reported. (E)  
800 Differences in abundance of OTUs present above 0.1% of total sequences in at least  
801 two replicate SC2 or FS2 cultures. Samples are indicated to the left of the plot; data in  
802 bold-face type are from the cultures shown in 4A; the first SC2 replicate is from the data  
803 reported in Figure 2, and the additional SC2, FS2A, and FS2B replicates were collected  
804 from bioreactor cultures used to gavage <sup>HMb</sup>mice in F-K. OTUs are classified to the  
805 lowest taxonomic level that could be confidently assigned ( $\geq 80\%$  confidence). Yellow  
806 represents  $< 0.01\%$  abundance and blue represents  $\geq 64\%$  of total sequences as  
807 indicated by shading; pale yellow indicates no detected sequences (ND). In(F)-(K), data  
808 was collected from <sup>HMb</sup>mice treated as indicated below the plots. Treatments were  
809 administered as described in Figure 3. (F) Percent of day 0 body mass on day 2 of  
810 infection.  $\log_{10}$  levels of *C. difficile* in mouse feces on day 1(G), day 4/5 (H) or day 7 (I)  
811 following initial *C. difficile* challenge. *C. difficile* levels at the mid-point were collected on  
812 day 4 or 5 based upon experiment as described in methods. (H) Percent of relapse day  
813 0 body mass on day 2 following induction of relapse with clindamycin IP injection. (I)  
814 Level of *C. difficile* detected in feces on day 7 following induction of relapse. Lines

815 represent medians; significant ( $p < 0.05$ ) differences detected in distributions of  
816 community-treated mice compared to PBS-treated mice as determined by one-way  
817 Kruskal-Wallis testing with Dunn's correction for multiple comparisons are reported.  
818 Longitudinal data from treatments shown in F-K are reported in Fig. S3.  
819

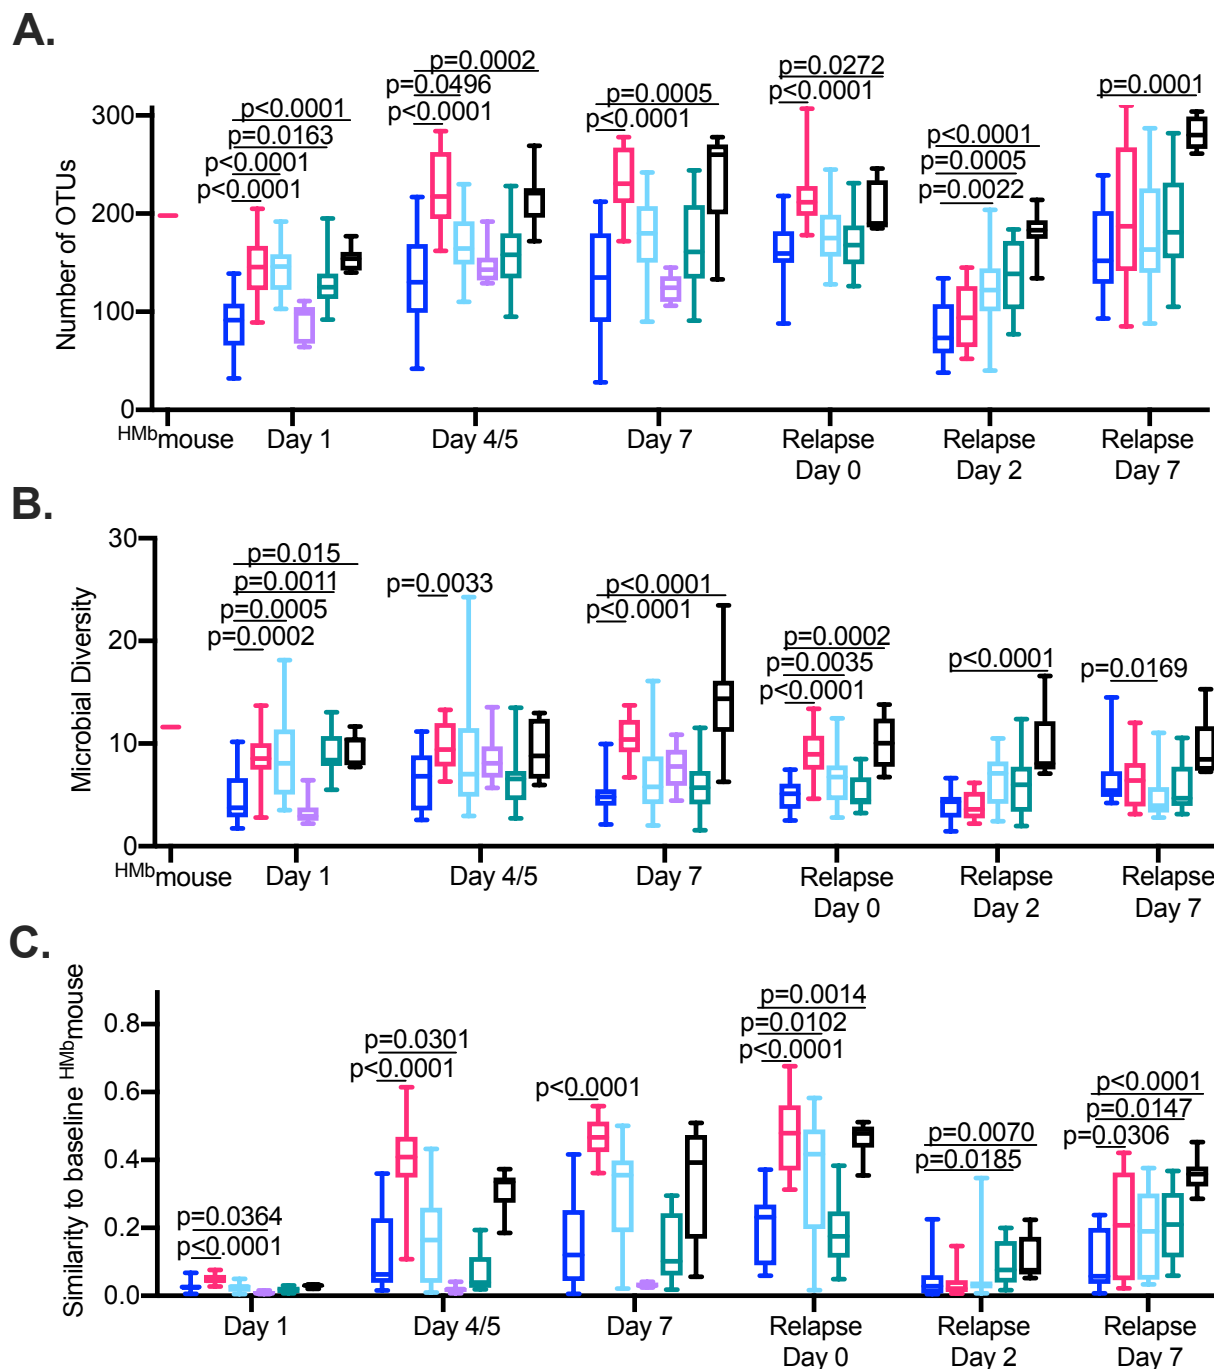

820  
 821 **Fig 5. Treatment with SC2 and FS2C restores microbial diversity and shifts**  
 822 **microbiome composition towards baseline state observed in <sup>H<sup>mb</sup></sup>mice not treated**  
 823 **with antibiotics.** 16S rRNA gene sequence data was obtained from bacteria present in  
 824 the feces of mice treated with FMT (magenta), SC2 (light blue), FS2A (violet), FS2B

825 (teal), FS2C (black) or PBS (dark blue) on days 1, 4 or 5, and 7 following initial *C.*  
826 *difficile* infection and day 0, 2, and 7 relative to initiation of relapse with Clindamycin IP.  
827 (For FS2A-treated mice, 16S rRNA gene sequence data was obtained only from  
828 samples collected during initial infection for FS2A-treated mice). 16S rRNA sequence  
829 data was also obtained from a pooled fecal sample collected from <sup>HMb</sup>mouse not treated  
830 with antibiotics that was used for FMT administration. (A) Number of OTUs and (B)  
831 Microbial diversity (Inverse Simpson Index) measured in sample collected from <sup>HMb</sup>mice  
832 not treated with antibiotics used for FMT administration (<sup>HMb</sup>mouse) and in samples  
833 collected from treated mice at time points indicated below graph. (C) Similarity to  
834 baseline <sup>HMb</sup>mouse sample used for FMT administration measured in samples at time  
835 points indicated below graph. Boxes represents the interquartile ranges, horizontal lines  
836 indicate the medians, and vertical lines indicate the ranges of data collected from  
837 replicate mouse samples at each time point. Significance of differences in microbe-  
838 treated compared to PBS-treated animals at each time point were evaluated with one-  
839 way Kruskal-Wallis testing with Dunn's correction for multiple comparisons; p-values  
840 <0.05 are reported.

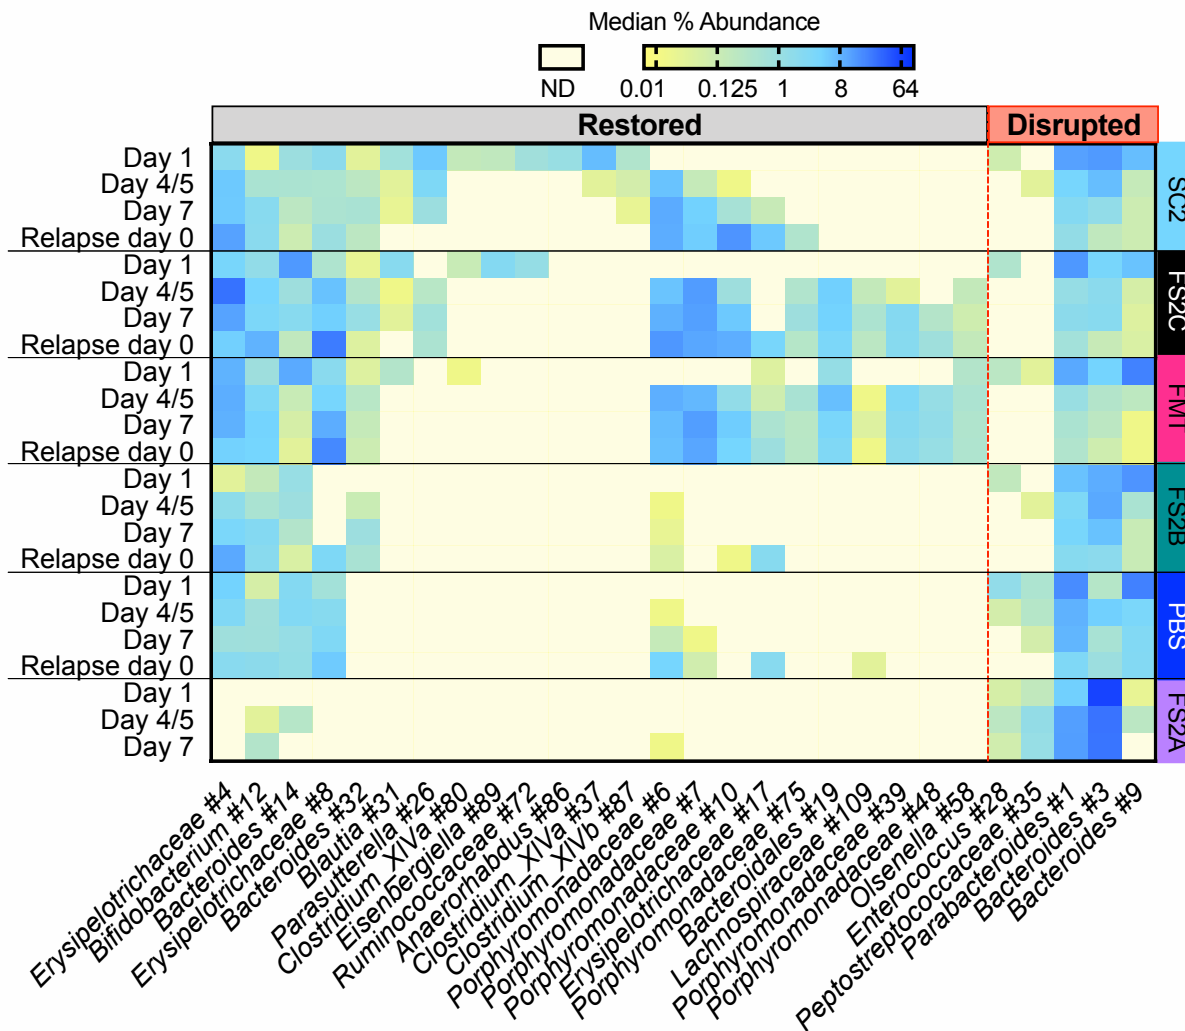

841

842 **Fig 6. Treatment with simplified communities alters recovery of endogenous**

843 **microbes.** We used LEfSe to identify significantly enriched or depleted taxa between

844 treatments that accelerated microbiome recovery in Fig. 5C (FMT, FS2C, SC2;

845 restorative) and treatments with more prolonged disruption (PBS, FS2A, FS2B;

846 disruptive). Independent analyses were performed for samples on days 1, 4/5, 7, and

847 relapse day 0; OTUs with LDA values determined by LEfSe  $\geq 3$  for at least one time

848 point are shown. Intensity of shading correlates to the median percent abundance

849 measured for the treated mice at the indicated time points, with median abundances  $\geq$

850 64% shaded dark blue and median values equal to 0.01% shaded dark yellow. Samples  
851 in which sequences were below the detection limit (ND, not detected) are shaded  
852 transparent yellow. OTUs are classified to the lowest taxonomic level that could be  
853 confidently assigned ( $\geq 80\%$  confidence). *Peptostreptococcaceae* #35 is likely *C. difficile*  
854 as the representative sequence has 100% identity to *C. difficile* and abundance over  
855 course of infection correlates well with *C. difficile* levels reported in Fig. 3 and 4. The  
856 complete set of OTUs identified by LEfSe are provided in Table S3.  
857





866 infection (day 1, 4/5, 7) were evaluated with one-way Kruskal-Wallis testing with Dunn's  
867 correction for multiple comparisons; p-values <0.05 are reported in (B). (B) Data from  
868 days 4/5 and 7 re-plotted from (A). Box represents the interquartile range, horizontal line  
869 indicates the median, and vertical lines indicate the range of data collected from fecal  
870 communities. (C) Percent abundance of OTUs that persist over time in mice treated with  
871 SC2, FS2A, FS2B, and/or FS2C. OTUs detected in *in vitro* samples were designated as  
872 persistent if the median level in a treatment group on day 7 and/or relapse day 2 sample  
873 was  $\geq 0.01\%$ . Intensity of shading correlates to the median percent abundance  
874 measured for the treated mice at the indicated time points. OTU labels in bold-face type  
875 have also been detected in <sup>HMb</sup>mice as described in Table S1. Abundance data from  
876 persistent OTUs at later times during infection (relapse days 0 and 7) and from OTUs  
877 abundant in day 0 samples that did not persist over time in treated-mice are presented  
878 in Table S4.

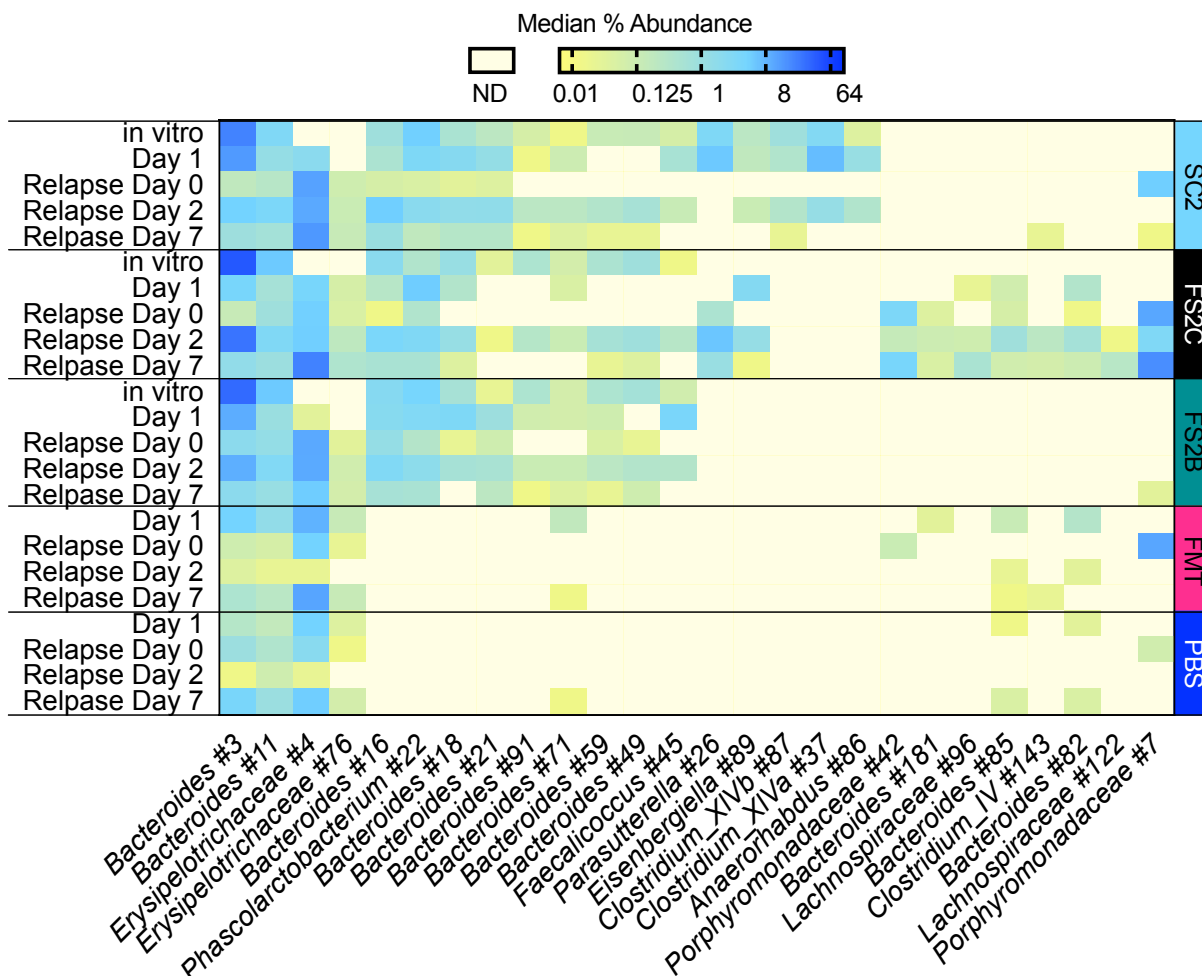

879

880 **Fig 8. Treatment with SC2, FS2C and FS2B led to distinct microbiome responses**

881 **during disease relapse.** LEfSe was used to identify OTUs that differed significantly

882 between treatment groups in the feces of mice on days 2 and 7 following induction of

883 relapse with clindamycin IP. Independent analyses were performed for samples on

884 relapse day 2 and 7; OTUs with LDA values determined by LEfSe  $\geq 3$  for at least one

885 time point are shown. The complete set of LEfSe data is shown in Table S5. Median

886 abundance of OTUs in *in vitro* SC2, FS2C, FS2B cultures as well as all the feces of

887 treated mice on day 1 and relapse day 0 samples are included for comparison as

888 described in the text.

889 **Supplemental Material**

890 **Figure Legends**

891 **Figure S1. *C. difficile* proliferation in triplicate cultures seeded with initially**  
892 **suppressive communities.** *C. difficile* levels from triplicate reactors (closed circles) re-  
893 cultured from cryopreserved simplified communities are plotted with the donor sample  
894 designation indicated below the graph and shading as indicated in Figure 2. Open  
895 circles indicate levels of *C. difficile* detected in the initial culture reported in Fig 1B. Lines  
896 represent medians of all four data points. Dotted lines indicate levels of *C. difficile* that  
897 are  $\geq 100$  and  $>10,000$  times lower than the maximum *C. difficile* levels reported in  
898 Figure 1.

899

900 **Fig S2. Simplified microbial communities SC1 and SC2 suppress *C. difficile* in**  
901 **<sup>HMb</sup>mouse model of CDI.** Longitudinal data collected from <sup>HMb</sup>mice that were  
902 administered treatments described in Figure 3. (A-D) % of day 0 body mass and (E-I)  
903 Log<sub>10</sub> *C. difficile* levels in feces of mice over the first seven days following infection. (L-  
904 O) % of relapse day 0 body mass and (P-S) log<sub>10</sub> *C. difficile* levels in feces of mice over  
905 time following initiation of relapse by IP injection of clindamycin. Data presented are  
906 from mice treated with human FMT (A,F,KO), <sup>HMb</sup>mouse FMT (E,J,N), SC1 (B,G,L,P),  
907 SC2 (C,H,M,Q) and SC3 (D,I) Lines indicate medians and error bars indicate  
908 interquartile ranges. Values for PBS-treated mice are in dark blue. Treatments that differ  
909 significantly from PBS-treated mice were evaluated with one-way Kruskal-Wallis testing  
910 with Dunn's correction for multiple comparisons with  $p < 0.05$  indicated by asterisks.  
911 Response during relapse was not tested in SC3-treated mice.

912

913 **Fig S3. FS2B and FS2C communities suppress *C. difficile* in <sup>HMb</sup>mouse model of**

914 **CDI.** Longitudinal data collected from <sup>HMb</sup>mice that were administered treatments

915 described in Figure 4 and in the text. (A-E) Percent of day 0 body mass and (F-J) log<sub>10</sub>

916 levels of *C. difficile* in feces over time during the first seven days following infection. (K-

917 O) Percent of relapse day 0 body mass and (P-S) levels of *C. difficile* in feces over time

918 during the seven days following initiation of relapse by IP injection of clindamycin. Data

919 presented are from mice treated with <sup>HMb</sup>mouse FMT (A, F, K, P) , SC2 (B, G, L, Q),

920 FS2A (C, H, M), FS2B (D, I, N, R) or FS2C (E, J, O, S). Data from PBS-treated mice

921 (dark blue lines) are repeated in each panel for reference. Lines represent median

922 values and error bars represent interquartile ranges. Data points identified as

923 statistically significant in Figure 4 are indicated by asterisks.

924

925 **Fig S4. Summary of process used to identify simplified communities with ability**

926 **to inhibit *C. difficile in vitro* and limit *C. difficile* associated disease *in vivo*.** As

927 described in the text, simplified communities were initially generated through dilution of

928 complex fecal communities and tested for their ability to inhibit *C. difficile* persistence *in*

929 *vitro*. A subset of original retained ability to inhibit *C. difficile* when re-grown from frozen

930 stocks. Four communities (SC1, SC2, SC3, and SC4) were identified for subsequent *in*

931 *vivo* testing. Two of these simplified communities, SC1 and SC2 were tested to see if

932 they could be further simplified *in vitro* and retain ability to inhibit *C. difficile*. SC1 lost

933 ability to inhibit *C. difficile* upon dilution but it was retained by SC2. Three further

934 simplified SC2 communities were identified for testing *in vivo* and designated FS2A,

935 FS2B, and FS2C. SC1, SC2, SC3, SC4, FS2A, FS2B, and FS2C were tested *in vivo* in  
936 a humanized microbiota mouse model of *C. difficile* infection. SC1, SC2, FS2B, and  
937 FS2C provided protection from *C. difficile* associated disease. SC3 and FS2A failed to  
938 provide protection. SC4 was toxic to mice prior to *C. difficile* administration.

939  
940 **Fig S5. Correlation analysis of levels of *C. difficile*, *C. difficile* toxin, and body**  
941 **mass change during initial infection.** Correlation analysis of % body mass on day 2  
942 of infection relative to *C. difficile* levels on (A) day 1, (B) day 4/5, or (C) day 7 from all  
943 mice tested in experiments 1-3. Linear regression formulas and correlation coefficients  
944 for each plot are indicated in the corner of each graph. For regression plots,  $p < 0.0001$ .

945  
946 **Tables:**  
947 **Table S1.** Characterization of OTUs clustered at >99% ANI shared by simplified  
948 communities and <sup>HMb</sup>mice.

949  
950 **Table S2.** Characterization of OTUs clustered at > 97% ANI shared by simplified  
951 communities and <sup>HMb</sup>mice.

952  
953 **Table S3.** Abundance of OTUs that differed significantly between treatments that  
954 restored microbiome diversity towards baseline (FMT, FS2C, SC2) and those that did  
955 not (PBS, FS2A, FS2B).

956

957 **Table S4.** Persistence of OTUs present in SC2, FS2A, FS2B, and FS2C over time in  
958 treated <sup>HMb</sup>mice.

959

960 **Table S5.** Abundance of OTUs in control and microbe-treated <sup>HMb</sup>mice that differ  
961 significantly between treatments.
